## 1 **Conserved anti-inflammatory effects and sensing of butyrate in zebrafish**

2 Pradeep Manuneehi Cholan <sup>1</sup>, Alvin Han <sup>2</sup>, Brad R Woodie <sup>1,2</sup>, Angela RM Kurz <sup>3</sup>, Warwick  
3 J Britton <sup>1,4,5</sup>, Lihua Ye <sup>2</sup>, Zachary C Holmes <sup>2</sup>, Jessica R McCann <sup>2</sup>, Lawrence A David <sup>2</sup>,  
4 John F Rawls <sup>2</sup>, Stefan H Oehlers <sup>1,4</sup>

5 <sup>1</sup> Tuberculosis Research Program at the Centenary Institute, The University of Sydney,  
6 Camperdown NSW 2050, Australia

7 <sup>2</sup> Department of Molecular Genetics and Microbiology, Duke Microbiome Center, Duke  
8 University School of Medicine, Durham NC 27710, USA

9 <sup>3</sup> Centenary Imaging and Sydney Cytometry at the Centenary Institute, The University of  
10 Sydney, Camperdown NSW 2050, Australia

11 <sup>4</sup> The University of Sydney, Discipline of Infectious Diseases and Immunology, Faculty of  
12 Medicine and Health, and Marie Bashir Institute, Camperdown NSW 2050, Australia

13 <sup>5</sup> Department of Clinical Immunology, Royal Prince Alfred Hospital, Camperdown, NSW  
14 2050 Australia

15

16 Corresponding author: Dr Stefan Oehlers [stefan.oehlers@sydney.edu.au](mailto:stefan.oehlers@sydney.edu.au)

17 ORCID: 0000-0003-0260-672X Twitter: @oehlerslab

18

### 19 **Abstract**

20 Short chain fatty acids (SCFAs) are produced by microbial fermentation of dietary fiber in the  
21 gut. Butyrate is a particularly important SCFA with anti-inflammatory properties and is  
22 generally present at lower levels in inflammatory diseases associated with gut microbiota  
23 dysbiosis in mammals. We aimed to determine if SCFAs are produced by the zebrafish  
24 microbiome and if SCFAs exert conserved effects on zebrafish immunity as an example of the  
25 non-mammalian vertebrate immune system. We demonstrate that bacterial communities from

26 adult zebrafish intestines synthesize all three main SCFA *in vitro*, although SCFA were below  
27 our detectable limits in zebrafish intestines *in vivo*. Immersion in butyrate, but not acetate or  
28 propionate, reduced the recruitment of neutrophils and M1-type pro-inflammatory  
29 macrophages to wounds. We found conservation of butyrate sensing by neutrophils via  
30 orthologs of the *hydroxycarboxylic acid receptor 1 (hcar1)* gene. Neutrophils from Hcar1-  
31 depleted embryos were no longer responsive to the anti-inflammatory effects of butyrate,  
32 while macrophage sensitivity to butyrate was independent of Hcar1. Our data demonstrate  
33 conservation of anti-inflammatory butyrate effects and identify the presence of a conserved  
34 molecular receptor in fish.

35 **Keywords:** zebrafish, butyrate, short chain fatty acid, inflammation, neutrophil, macrophage,  
36 tumor necrosis factor

37

## 38 **Introduction**

39 Short chain fatty acids (SCFAs) are microbial metabolites produced in the gut by the  
40 anaerobic fermentation of dietary fiber and protein in the large intestine <sup>1</sup>. The most abundant  
41 SCFAs are acetate, butyrate, and propionate. In addition to providing the host with an energy  
42 source, microbially-derived SCFAs exert anti-inflammatory effects through inhibition of  
43 histone deacetylases (HDAC) and activation of G-protein coupled receptors (GPCRs) <sup>2</sup>. Most  
44 research on SCFAs has reported their anti-inflammatory properties in mammals <sup>3-5</sup>. However,  
45 the anti-inflammatory mechanism responsible for the anti-inflammatory effects of SCFA  
46 administration has not been reported in fish species to date.

47

48 Zebrafish are an important model of vertebrate gut physiology with key experimental  
49 advantages including high fecundity, transparency, and well-developed gut digestive function  
50 by 6 days post fertilization (dpf) <sup>6</sup>. There is a high degree of intestinal immune conservation

51 across vertebrates, including the sensitivity of zebrafish intestinal epithelial cell progenitors to  
52 butyrate<sup>7-9</sup>. However, SCFA production has not been previously observed in the intestines of  
53 zebrafish, and it is unclear if the intestinal lumen of the zebrafish intestine provides a suitable  
54 niche for SCFA production<sup>9</sup>. Nevertheless, detectable amounts of acetate, butyrate, and  
55 propionate have been measured in several species of teleosts<sup>10-14</sup>.

56

57 We have used conservation between mammalian intestinal function and immunity to create  
58 zebrafish models of human intestinal inflammation<sup>15, 16</sup>. Key pattern recognition molecule  
59 families, such as the Toll-like receptors and Nod-like receptors, are evolutionarily ancient,  
60 and have conserved roles in zebrafish intestinal immunity<sup>7, 8, 17, 18</sup>. However, conservation of  
61 host molecules responsible for sensing SCFAs has not been explored in teleosts. Mammals  
62 utilize a wide range of molecules to sense SCFAs including G protein-coupled receptors  
63 (GPRs) GPR81 (also known as HCAR1) which is primarily present on immune cells and  
64 GPR109A which is expressed on intestinal epithelial cells. Microbially-derived SCFAs also  
65 exert direct effects on host physiology through histone deacetylase (HDAC) inhibition<sup>19-21</sup>.

66

67 In this study, we investigated whether SCFAs are produced in the zebrafish intestine, and if  
68 the anti-inflammatory effects and sensing of SCFAs are conserved in zebrafish. We find that  
69 the pattern of SCFA production by the zebrafish intestinal microbiota is different from that  
70 seen in mammals, but that the anti-inflammatory effects mechanisms of butyrate are  
71 conserved across vertebrate species and development regardless of the ability of their  
72 endogenous microbiota to produce measurable butyrate.

73

## 74 **Methods**

### 75 ***2.1 Zebrafish handling***

76 Adult zebrafish were housed at the Centenary Institute (Sydney Local Health District AEC  
77 Approval 17-036) and Duke University School of Medicine ((Duke Institutional Animal Care  
78 and Use Committee Protocol Approval A115-16-05). Adult zebrafish experimentation was  
79 approved by the Institutional Animal Care and Use Committees of Duke University approval  
80 A115-16-05. Zebrafish adults were reared, housed, and fed as previously described<sup>22</sup>. All  
81 zebrafish embryo research experiments and procedures were completed in accordance with  
82 Sydney Local Health District animal ethics guidelines under approval 17-036. Zebrafish  
83 embryos were obtained by natural spawning and embryos were maintained and raised in E3  
84 media at 28°C.

85

## 86 ***2.2 SCFA quantification from adult zebrafish***

87 Adult zebrafish were euthanized with 200 – 300 mg/L of ethyl 3-aminobenzoate  
88 methanesulfonate (tricaine) (Sigma, E10521) prior to dissection. For each sample, intestines  
89 dissected from five adult (90+ dpf) EK WT zebrafish males (roughly 0.2 g total) were pooled  
90 and homogenized using a Precellys 24 High-Powered Bead Homogenizer at 5500 rpm for 3  
91 cycles at 20 seconds per cycle with a 10 second delay between cycles. Samples were then  
92 acidified with HCl to a pH below 3, pelleted by centrifugation, and the supernatant was  
93 harvested. Filtered supernatant was stored at -80°C until quantification.

94

95 SCFA quantification as carried out on an Agilent 7890B GC FID, with an HP-FFAP capillary  
96 column (25 m length, ID 0.2 mm, film thickness 0.33 µm). Concentrations were determined  
97 using a linear model fit of a standard curve that encompasses the sample concentration range.  
98 Standardized concentrations used for each C2-C5 SCFA were as follows: 0.2, 0.5, 1, 2, 4, and  
99 8 mM.

100

### 101 ***2.3 In vitro synthesis of SCFA by zebrafish gut commensals***

102 Freshly dissected intestines from four adult (6-month-old) EK WT zebrafish males and frozen  
103 mouse fecal pellets were homogenized under reducing conditions to preserve the anaerobes.  
104 Samples were handled in a Coy anaerobic chamber and used to inoculate tubes containing  
105 brain-heart infusion (BHI) media (Thermo Scientific, OXOID) or Gifu anaerobic media  
106 (Sigma), both supplemented with deoxygenated hemin and vitamin K to a final concentration  
107 of 12.5 mg/L of hemin and 2.5 mg/L of vitamin K.

108

109 Tubes were incubated in a sealed anaerobic jar with a Gas-Pak (Becton and Dickinson) to  
110 maintain anaerobic conditions at 28°C for 24 hours. Samples were then acidified to a pH  
111 below 3 with HCl, pelleted by centrifugation, and the supernatant was harvested. Filtered  
112 supernatant was stored at -80°C until quantification with methods identical to those listed  
113 above in Section 2.2.

114

### 115 ***2.4 Drug treatments***

116 Embryos were treated with 30 mM sodium acetate (Sigma; S2889), 30 mM sodium butyrate  
117 (Sigma; B5887), 30 mM sodium propionate (Sigma; P1880), 50 µg/mL dexamethasone  
118 (Sigma; D4902), or 100 mM 6-aminocaproic acid (Sigma; A2504). Drug stocks were  
119 dissolved in DMSO or PBS and added to E3.

120

### 121 ***2.5 Tail wounding experiment***

122 Caudal fin amputation was performed on 5 dpf embryos unless otherwise indicated. Zebrafish  
123 embryos were anesthetized with tricaine. Embryos were cut posterior to the notochord using a  
124 sterile scalpel. Embryos were then recovered to fresh E3 and kept at 28°C.

125

## 126 **2.6 Imaging**

127 Live zebrafish embryos were anesthetized using tricaine, mounted on 3% methylcellulose  
128 (Sigma, M0512), and imaged using a Leica M205FA. ImageJ software was used to quantify  
129 the fluorescent pixel count within 100  $\mu$ m of the wound site.

130

131 Additional high resolution and time-lapse microscopy was carried out on anesthetized  
132 embryos embedded in 1% low melt agarose in a 96 well-plate with a Leica SP8 confocal  
133 microscope or Deltavision Elite microscope.

134

## 135 **2.7 Neutrophil tracking**

136 Time-lapse images were processed and analyzed using ImageJ. Neutrophils were tracked  
137 using the Trackmate plugin in ImageJ software and further quantified using Chemokine and  
138 Migration tool software (Ibidi).

139

## 140 **2.8 Germ-free derivation and microdissection of embryos**

141 Germ-free zebrafish were created and maintained as previously described<sup>23</sup>. The gut and  
142 body of 5 dpf embryos were separated using a 25-gauge needle and added to Trizol LS  
143 (Invitrogen; 10296010) for RNA extraction.

144

## 145 **2.9 RNA extraction, cDNA synthesis and quantitative PCR (qPCR)**

146 10 - 20 zebrafish embryos were pooled and lysed using a 25-gauge needle in Trizol LS for  
147 RNA extraction. cDNA was synthesized using a High-capacity reverse transcription kit  
148 (ThermoFisher Scientific, 4368814). qPCR was carried out using Power UP SYBR green  
149 master mix (ThermoFisher Scientific, 4385610) on a CFX96 Real-Time system (BioRad).

150 Primer pairs (5`- 3`); *I8s* TCGCTAGTTGGCATCGTTTATG and

151 CGGAGGTTCTGAAGACGATCA; *hcar1* CATCGTCATCTACTGCTCCAC and  
152 GCTAACACAAACCGCACA.

153

## 154 **2.10 gRNA synthesis and CRISPR injections**

155 gRNA templates for *hcar1-2* (5'- 3'): Target 1

156 TAATACGACTCACTATAGGTACCGGCGGCTCGATTGGGTTTTAGAGCTAGAAATA

157 GC, Target 2

158 TAATACGACTCACTATAGGAGCAACTCTCGCTTCACTGTTTTAGAGCTAGAAATA

159 GC, Target 3

160 TAATACGACTCACTATAGGGATTTCGAGAGATGTTACTGTTTTAGAGCTAGAAATA

161 GC. gRNA was synthesized as previously described<sup>24</sup>.

162

163 A 1:1 solution of gRNA and 500 µg/mL of Cas9 nuclease V3 (Integrated DNA Technology)

164 was prepared with phenol red dye (Sigma, P0290). Freshly laid eggs were collected from

165 breeding tanks and the solution was injected in the yolk sac of the egg before the emergence

166 of the first cell with a FemtoJet 4i (Eppendorf).

167

## 168 **2.11 Statistics**

169 All statistical analyses (t-tests and ANOVA where appropriate) were performed using

170 GraphPad Prism8. Outliers were removed using ROUT, with Q = 1%. All data are

171 representative of at least 2 biological replicates.

172

## 173 **Results**

### 174 **3.1 Zebrafish gut commensals are capable of producing SCFA ex vivo**

175 We initially tried to detect SCFAs in whole intestines and their contents dissected from  
176 conventionally-reared adult zebrafish using gas chromatography but levels of acetate,  
177 butyrate, or propionate were below our limit of detection of 0.00132 mmol SCFA per g of  
178 tissue.

179

180 We next sought to determine if the conventional zebrafish gut microbiota had the capacity to  
181 produce SCFAs using *ex vivo* culture on two rich medias, BHI and Gifu. We found that  
182 microbial communities cultured from conventionally-reared adult zebrafish intestines were  
183 able to synthesize acetate under both aerobic and anaerobic conditions (**Figure 1**). Butyrate  
184 and propionate were only detected under anaerobic conditions. The highest concentrations of  
185 SCFA were detected under anaerobic conditions in BHI where acetate, propionate, and  
186 butyrate were present in a roughly 90:5:5 ratio.

187

### 188 ***3.2 Butyrate reduces the recruitment of zebrafish neutrophils to a wound***

189 We first observed the effect of SCFAs (acetate, butyrate and propionate) on neutrophil  
190 migration following a tail wound injury using *Tg(lyzC:DsRed)<sup>nz50</sup>* and *Tg(lyzC:GFP)<sup>nz117</sup>*  
191 transgenic zebrafish lines where neutrophils are fluorescently labelled (**Figure 2A**). We  
192 observed a significant reduction in the number of recruited neutrophils at 6 hours post  
193 wounding (hpw) in embryos exposed to butyrate by immersion (**Figure 2B**). There were no  
194 changes seen with acetate or propionate, but dexamethasone, a corticosteroid anti-  
195 inflammatory used as a positive control, reduced neutrophil recruitment as expected.

196

197 We next assessed the quality of neutrophil recruitment by intravital imaging. We observed  
198 reduced neutrophil velocity (**Figure 2C**), and increased meandering index (total distance  
199 traveled / Euclidean distance) in butyrate-treated embryos (**Figure 2D**).



200

201 We next sought to determine if butyrate sensitivity is dependent on intestinal maturity by  
202 repeating the tail wound experiment using 2 dpf embryos, a developmental stage prior to  
203 significant intestinal morphogenesis<sup>25</sup>, and found neutrophil recruitment was overall reduced  
204 compared to 5 dpf, but still further inhibited by butyrate immersion (**Figure 2E**).

205

### 206 **3.3 Butyrate reduces the proportion of TNF positive macrophages at the wound site**

207 Next, we examined the effect of SCFAs on macrophage recruitment and polarization  
208 following wounding. *Tg(mfap4:tdTomato)<sup>xt12</sup>* transgenic zebrafish were used to visualize  
209 macrophage numbers<sup>26</sup>. Relative to control embryos, macrophage recruitment was reduced  
210 by butyrate and increased by propionate treatment at 6 hpw (**Figure 3A**). Consistent with a  
211 lack of effect on neutrophil recruitment, acetate treatment did not affect the number of  
212 recruited macrophages, and as the positive control anti-inflammatory dexamethasone  
213 significantly reduced macrophage recruitment. These changes were maintained at 24 hpw  
214 when inflammation is in the resolution phase (**Figure 3B**).

215

216 We next used the *TgBAC(tnfa:gfp)<sup>pd1026</sup>* line to monitor inflammatory gene expression<sup>27</sup>. As  
217 expected, since macrophages are the primary producers of TNF in zebrafish embryos, total  
218 TNF promoter fluorescence area at 24 hpw reflected the trend of macrophages recruitment in  
219 each treatment condition with butyrate, but not acetate or propionate, reducing TNF promoter  
220 expression (**Figure 3C**). We next crossed the *TgBAC(tnfa:gfp)<sup>pd1026</sup>* and  
221 *Tg(mfap4:tdTomato)<sup>xt12</sup>* lines to monitor macrophage inflammatory polarization as defined by  
222 inflammatory TNF promoter expression (**Figure 3D**)<sup>28</sup>. Butyrate treatment reduced the  
223 percentage of *TgBAC(tnfa:gfp)<sup>pd1026</sup>* positive macrophages (**Figure 3E**).

224

### 225 **3.4 Butyrate does not have toxic effects as measured by hemostatic indices**

226 Butyrate has been previously shown to reduce the proliferation of zebrafish intestinal  
227 epithelial cells<sup>9</sup>. This raises the possibility that inhibition of leukocyte recruitment by  
228 butyrate immersion was due to toxicity. Changes to zebrafish hemostasis have been observed  
229 in models of toxicity and inflammation<sup>29,30</sup>.

230

231 We used *Tg(fabp10a:fgb-EGFP)<sup>mi4001</sup>*, where fibrin clots are visualized by GFP deposition,  
232 and *Tg(-6.0itga2b:eGFP)<sup>la2</sup>*, where thrombocytes are GFP-labeled, transgenic zebrafish lines  
233 to monitor hemostasis following transection of the dorsal aorta and posterior cardinal vein<sup>31</sup>,  
234<sup>32</sup>. We stabilized clots with aminocaproic acid as a positive control<sup>33</sup>. Fibrinogen  
235 accumulation in *Tg(fabp10a:fgb-EGFP)<sup>mi4001</sup>* embryos was unchanged at the wound site in  
236 response to butyrate treatment, however we noted that propionate treatment caused increased  
237 fibrinogen accumulation (**Supplementary Figure 1A**). No changes were observed in  
238 thrombocytes accumulation in the *Tg(-6.0itga2b:eGFP)<sup>la2</sup>* line following any of the SCFA  
239 treatments (**Supplementary Figure 1B**).

240

### 241 **3.5 Characterization of the zebrafish hydrocarboxylic acid receptor 1**

242 *Hydrocarboxylic acid receptor 1 (HCAR1)* is an important receptor for butyrate in mammals  
243<sup>19</sup>. We identified a conserved region of zebrafish chromosome 10, human chromosome 12,  
244 and mouse chromosome 5 containing *density regulated re-initiation and release factor (denr)*,  
245 *coiled-coil domain-containing 62 (ccdc62)*, *huntingtin interacting protein 1 related a (hip1ra)*  
246 loci and the single exon *hcar* family (**Figure 4A**). Two copies of the putative zebrafish *hcar1*  
247 (with 93% identity and lacking sufficient divergence to differentiate by PCR) were identified  
248 as annotated by the single-entry NM\_001163295.1 (Danio rerio hydroxycarboxylic acid  
249 receptor 1-2 (hcar1-2), mRNA) suggesting the possibility of a tandem duplication event

250 (Supplementary File). Kuei *et al.* previously annotated what we refer as *hcar1a* as *gpr81-2*  
251 and *hcar1b* as *gpr81-1*<sup>34</sup>. The predicted 933/936 bp transcript of *hcar1a/hcar1b* is expected  
252 to give rise to a 310/311 amino acid protein with 89% amino acid identity. The  
253 Hcar1a/Hcar1b hypothetical proteins contain 7 predicted transmembrane helix domains  
254 characteristic of a GPCR and an E-value of  $7.05^{-157}/3.21^{-166}$  for the HCAR subfamily<sup>35</sup>. The  
255 predicted zebrafish proteins have approximately 43% identity to the human HCAR1, HCAR2,  
256 and HCAR3; and mouse HCAR1 and HCAR2 proteins.

257

258 Mammalian *HCAR1* is highly expressed by intestinal epithelial cells and neutrophils<sup>19</sup>.  
259 Compared to other immune cells, *hcar1* expression is enriched in zebrafish neutrophils<sup>36,37</sup>.  
260 We sought to characterize expression of *hcar1* in the intestines of zebrafish embryos using  
261 microdissection of 5 dpf embryos. We found increased *hcar1* expression in dissected guts  
262 compared to the rest of the embryo by RT-qPCR analysis (**Figure 4B**). Interestingly, there  
263 were no significant changes observed with the absence of microbial colonization in germ-free  
264 embryos (**Supplementary Figure 2**).

265

### 266 ***3.6 The anti-inflammatory effects of butyrate on neutrophils, but not macrophages, are*** 267 ***dependent on Hcar1.***

268 To determine if butyrate acts through the Hcar1 receptor, we next used CRISPR/Cas9  
269 technology to knockdown *hcar1* expression in zebrafish embryos. We utilized three target  
270 sites in *hcar1a*, two of which had strong homology to sequences in *hcar1b* (Supplementary  
271 File). We confirmed ~50% transcript depletion by RT-qPCR for a shared *hcar1a/hcar1b*  
272 sequence (**Figure 4C**). Embryo development was morphologically normal compared to  
273 embryos injected with control scrambled guide RNA-Cas9 complex (**Figure 4D**).

274

275 We performed tail wound injury on *hcar1* knockdown embryos. Knockdown of *hcar1*  
276 abrogated the effect of butyrate treatment on neutrophil recruitment (**Figure 4E**). As expected  
277 from the lack of expression on macrophages, *hcar1* knockdown did not affect the reduced  
278 macrophage recruitment (**Figure 4F**) and TNF promotor expression (**Figure 4G**) induced by  
279 butyrate immersion.

280

## 281 **Discussion**

282 This study shows for the first time that commensal microbiota residing in the zebrafish  
283 intestine are capable of producing SCFAs. Experimentally, we demonstrate that the effects,  
284 and sensing, of butyrate are conserved between zebrafish and mammals. Out of the three main  
285 SCFAs, only the anti-inflammatory effect of butyrate was found to be conserved in zebrafish  
286 embryos. We applied the commonly used tail wounding model to demonstrate an anti-  
287 inflammatory effect of butyrate on zebrafish neutrophils and macrophages. Using Crispr-Cas9  
288 targeted mutagenesis, we also identified conserved butyrate responsiveness of the zebrafish  
289 Hcar1 receptor.

290

291 The anti-inflammatory effects of butyrate have been established in numerous *in vivo* and *in*  
292 *vitro* studies of mammalian hosts but not in fish<sup>38</sup>. Our zebrafish tail wound model  
293 demonstrates conservation of this property in a bony fish. Bony fish diverge from mammals  
294 approximate 420 million years ago suggesting that the sensing of microbially-derived SCFAs  
295 has been conserved from a common ancestor.

296

297 Our finding that immune cells are responsive to butyrate even before intestinal lumen  
298 formation in early embryonic development is surprising as 2 dpf embryos are usually  
299 contained within relatively impervious chorions that prevent microbial colonization of the

300 embryo. This suggests that the ability to sense xenobiotic SCFAs is programmed alongside  
301 the ability to sense more traditional microbially-associated molecular patterns via pattern  
302 recognition molecules.

303

304 The HCAR1/GPR81 butyrate receptor is expressed by many mammalian innate immune cells  
305 <sup>19</sup>. Expression in zebrafish is strongest in granulocytes <sup>36, 37</sup>. Our knockdown experiments  
306 further demonstrate Hcar1 is necessary for the butyrate sensitivity of neutrophils but not  
307 macrophages. Thus, the butyrate-Hcar1-neutrophil behavior axis is evolutionarily ancient.

308

309 Human macrophages in the presence of butyrate have been shown to differentiate into an M2  
310 phenotype which exhibits anti-microbial and tissue reparative properties <sup>39, 40</sup>. These effects  
311 are independent of HCAR1 signal transduction and are believed to be an effect of butyrate  
312 acting as a histone deacetylase inhibitor <sup>41, 42</sup>. SCFAs can permeate cell membranes through  
313 passive diffusion or through specific transporters such as the proton-coupled  
314 monocarboxylate-transporter 1 (MCT1) and sodium-coupled monocarboxylate-transporter 1  
315 (SMCT1) <sup>43-46</sup>. Consistent with this literature, we show butyrate reduces the expression of  
316 pro-inflammatory TNF by zebrafish macrophages independent of Hcar1 expression. Our data  
317 suggests the HCAR1-independent immunosuppressive actions of butyrate may be conserved  
318 across vertebrate evolution.

319

320 Our data demonstrate that, under nutrient-rich *in vitro* conditions, gut commensal microbiota  
321 from adult zebrafish are capable of synthesizing the three most important SCFAs: acetate,  
322 propionate, and butyrate. However, the ratio of acetate, propionate, and butyrate produced  
323 under anaerobic conditions in BHI media (90:5:5) differed from the ratio typically observed  
324 in mammalian colons (60:20:20) <sup>1</sup>. This may be due to the differing bacterial communities

325 found in zebrafish and mammalian intestines. The most abundant bacterial phyla in the adult  
326 zebrafish intestine are Proteobacteria and Fusobacteria, whereas mouse and human intestines  
327 are dominated by members of phyla Bacteroidetes and Firmicutes<sup>47</sup>. Considering the SCFA  
328 production we observed *in vitro*, our inability to detect SCFA *in vivo* was surprising. We  
329 anticipate this could be due to rapid host or microbial metabolism of SCFA produced within  
330 the zebrafish gut, or the composition of the diet fed to the zebrafish tested in this experiment.  
331 Zebrafish are omnivores and were fed protein rich diets in the Duke aquaculture facility. A  
332 diet with more SCFA substrates such as carbohydrates and fiber may yield detectable SCFA  
333 production *in situ*.

334

335 Interestingly, we observed increased macrophage and fibrinogen clot accumulation at the  
336 wound site following propionate treatment, indicative of a pro-inflammatory effect. Although  
337 this is at odds with anti-inflammatory effects of propionate in mammals<sup>48-50</sup>, it is consistent  
338 with evidence of an immunostimulatory effect of propionate in teleosts<sup>51,52</sup>.

339

340 Overall this manuscript provides further evidence of conserved mechanisms of host-microbe  
341 interaction within vertebrates. We present evidence that immunological sensitivity to butyrate  
342 is conserved across vertebrates. Furthermore, there is conservation of the molecular  
343 machinery that senses butyrate even down to the responsiveness of individual leukocyte  
344 lineages.

345

#### 346 **Acknowledgements**

347 Funding: Australian National Health and Medical Research Council Project Grant  
348 APP1099912; The University of Sydney Fellowship G197581; NSW Ministry of Health  
349 under the NSW Health Early-Mid Career Fellowships Scheme H18/31086 to SHO.

350 The authors acknowledge the facilities and the scientific and technical assistance of the  
351 BioImaging Facility and Sydney Cytometry at Centenary Institute.

352 The authors declare no conflicts of interest.

353

## 354 **References**

- 355 1. den Besten G, van Eunen K, Groen AK, Venema K, Reijngoud DJ, Bakker BM. The  
356 role of short-chain fatty acids in the interplay between diet, gut microbiota, and host energy  
357 metabolism. *J Lipid Res* 2013; 54:2325-40.
- 358 2. Tan J, McKenzie C, Potamitis M, Thorburn AN, Mackay CR, Macia L. The role of  
359 short-chain fatty acids in health and disease. *Adv Immunol* 2014; 121:91-119.
- 360 3. Tedelind S, Westberg F, Kjerrulf M, Vidal A. Anti-inflammatory properties of the  
361 short-chain fatty acids acetate and propionate: a study with relevance to inflammatory bowel  
362 disease. *World J Gastroenterol* 2007; 13:2826-32.
- 363 4. Zheng N, Gao Y, Zhu W, Meng D, Walker WA. Short chain fatty acids produced by  
364 colonizing intestinal commensal bacterial interaction with expressed breast milk are anti-  
365 inflammatory in human immature enterocytes. *PLoS One* 2020; 15:e0229283.
- 366 5. Baxter NT, Schmidt AW, Venkataraman A, Kim KS, Waldron C, Schmidt TM.  
367 Dynamics of Human Gut Microbiota and Short-Chain Fatty Acids in Response to Dietary  
368 Interventions with Three Fermentable Fibers. *mBio* 2019; 10.
- 369 6. Matty MA, Oehlers SH, Tobin DM. Live Imaging of Host-Pathogen Interactions in  
370 Zebrafish Larvae. *Methods Mol Biol* 2016; 1451:207-23.
- 371 7. Oehlers SH, Flores MV, Chen T, Hall CJ, Crosier KE, Crosier PS. Topographical  
372 distribution of antimicrobial genes in the zebrafish intestine. *Dev Comp Immunol* 2011;  
373 35:385-91.
- 374 8. Oehlers SH, Flores MV, Hall CJ, Swift S, Crosier KE, Crosier PS. The inflammatory  
375 bowel disease (IBD) susceptibility genes NOD1 and NOD2 have conserved anti-bacterial  
376 roles in zebrafish. *Dis Model Mech* 2011; 4:832-41.
- 377 9. Kaiko GE, Ryu SH, Koues OI, Collins PL, Solnica-Krezel L, Pearce EJ, et al. The  
378 Colonic Crypt Protects Stem Cells from Microbiota-Derived Metabolites. *Cell* 2016;  
379 165:1708-20.
- 380 10. Romano N, Simon W, Ebrahimi M, Fadel AHI, Chong CM, Kamarudin MS. Dietary  
381 sodium citrate improved oxidative stability in red hybrid tilapia (*Oreochromis* sp.) but  
382 reduced growth, health status, intestinal short chain fatty acids and induced liver damage.  
383 *Aquaculture* 2016; 458:170-6.
- 384 11. Titus E, Ahearn GA. Short-chain fatty acid transport in the intestine of a herbivorous  
385 teleost. *J Exp Biol* 1988; 135:77-94.
- 386 12. Mountfort DO, Campbell J, Clements KD. Hindgut fermentation in three species of  
387 marine herbivorous fish. *Appl Environ Microbiol* 2002; 68:1374-80.
- 388 13. Hao YT, Wu SG, Jakovlić I, Zou H, Li WX, Wang GT. Impacts of diet on hindgut  
389 microbiota and short-chain fatty acids in grass carp (*Ctenopharyngodon idellus*). *Aquaculture*  
390 *Research* 2017; 48:5595-605.
- 391 14. Ebrahimi M, Daeman NH, Chong CM, Karami A, Kumar V, Hoseinifar SH, et al.  
392 Comparing the effects of different dietary organic acids on the growth, intestinal short-chain  
393 fatty acids, and liver histopathology of red hybrid tilapia (*Oreochromis* sp.) and potential use  
394 of these as preservatives. *Fish Physiol Biochem* 2017; 43:1195-207.

- 395 15. Oehlers SH, Flores MV, Hall CJ, Wang L, Ko DC, Crosier KE, et al. A whole animal  
396 chemical screen approach to identify modifiers of intestinal neutrophilic inflammation. *FEBS*  
397 *J* 2017; 284:402-13.
- 398 16. Oehlers SH, Flores MV, Hall CJ, Crosier KE, Crosier PS. Retinoic acid suppresses  
399 intestinal mucus production and exacerbates experimental enterocolitis. *Dis Model Mech*  
400 2012; 5:457-67.
- 401 17. Koch BEV, Yang S, Lamers G, Stougaard J, Spaink HP. Intestinal microbiome adjusts  
402 the innate immune setpoint during colonization through negative regulation of MyD88. *Nat*  
403 *Commun* 2018; 9:4099.
- 404 18. Cheesman SE, Neal JT, Mittge E, Seredick BM, Guillemin K. Epithelial cell  
405 proliferation in the developing zebrafish intestine is regulated by the Wnt pathway and  
406 microbial signaling via Myd88. *Proc Natl Acad Sci U S A* 2011; 108 Suppl 1:4570-7.
- 407 19. Ranganathan P, Shanmugam A, Swafford D, Suryawanshi A, Bhattacharjee P,  
408 Hussein MS, et al. GPR81, a Cell-Surface Receptor for Lactate, Regulates Intestinal  
409 Homeostasis and Protects Mice from Experimental Colitis. *J Immunol* 2018; 200:1781-9.
- 410 20. Arpaia N, Campbell C, Fan X, Dikiy S, van der Veeken J, deRoos P, et al. Metabolites  
411 produced by commensal bacteria promote peripheral regulatory T-cell generation. *Nature*  
412 2013; 504:451-5.
- 413 21. Furusawa Y, Obata Y, Fukuda S, Endo TA, Nakato G, Takahashi D, et al. Commensal  
414 microbe-derived butyrate induces the differentiation of colonic regulatory T cells. *Nature*  
415 2013; 504:446-50.
- 416 22. Murdoch CC, Espenschied ST, Matty MA, Mueller O, Tobin DM, Rawls JF. Intestinal  
417 Serum amyloid A suppresses systemic neutrophil activation and bactericidal activity in  
418 response to microbiota colonization. *PLoS Pathog* 2019; 15:e1007381.
- 419 23. Melancon E, Gomez De La Torre Canny S, Sichel S, Kelly M, Wiles TJ, Rawls JF, et  
420 al. Best practices for germ-free derivation and gnotobiotic zebrafish husbandry. *Methods Cell*  
421 *Biol* 2017; 138:61-100.
- 422 24. Wu RS, Lam, II, Clay H, Duong DN, Deo RC, Coughlin SR. A Rapid Method for  
423 Directed Gene Knockout for Screening in G0 Zebrafish. *Dev Cell* 2018; 46:112-25 e4.
- 424 25. Ng AN, de Jong-Curtain TA, Mawdsley DJ, White SJ, Shin J, Appel B, et al.  
425 Formation of the digestive system in zebrafish: III. Intestinal epithelium morphogenesis. *Dev*  
426 *Biol* 2005; 286:114-35.
- 427 26. Walton EM, Cronan MR, Beerman RW, Tobin DM. The Macrophage-Specific  
428 Promoter *mfap4* Allows Live, Long-Term Analysis of Macrophage Behavior during  
429 Mycobacterial Infection in Zebrafish. *PLoS ONE* 2015; 10:e0138949.
- 430 27. Marjoram L, Alvers A, Deerhake ME, Bagwell J, Mankiewicz J, Cocchiaro JL, et al.  
431 Epigenetic control of intestinal barrier function and inflammation in zebrafish. *Proc Natl*  
432 *Acad Sci U S A* 2015; 112:2770-5.
- 433 28. Nguyen-Chi M, Laplace-Builhe B, Travnickova J, Luz-Crawford P, Tejedor G, Phan  
434 QT, et al. Identification of polarized macrophage subsets in zebrafish. *Elife* 2015; 4:e07288.
- 435 29. McLeish JA, Chico TJ, Taylor HB, Tucker C, Donaldson K, Brown SB. Skin  
436 exposure to micro- and nano-particles can cause haemostasis in zebrafish larvae. *Thromb*  
437 *Haemost* 2010; 103:797-807.
- 438 30. Hortle E, Johnson KE, Johansen MD, Nguyen T, Shavit JA, Britton WJ, et al.  
439 Thrombocyte Inhibition Restores Protective Immunity to Mycobacterial Infection in  
440 Zebrafish. *J Infect Dis* 2019; 220:524-34.
- 441 31. Vo AH, Swaroop A, Liu Y, Norris ZG, Shavit JA. Loss of fibrinogen in zebrafish  
442 results in symptoms consistent with human hypofibrinogenemia. *PLoS ONE* 2013; 8:e74682.
- 443 32. Lin HF, Traver D, Zhu H, Dooley K, Paw BH, Zon LI, et al. Analysis of thrombocyte  
444 development in CD41-GFP transgenic zebrafish. *Blood* 2005; 106:3803-10.



- 445 33. Liu Y, Kretz CA, Maeder ML, Richter CE, Tsao P, Vo AH, et al. Targeted  
446 mutagenesis of zebrafish antithrombin III triggers disseminated intravascular coagulation and  
447 thrombosis, revealing insight into function. *Blood* 2014; 124:142-50.
- 448 34. Kuei C, Yu J, Zhu J, Wu J, Zhang L, Shih A, et al. Study of GPR81, the lactate  
449 receptor, from distant species identifies residues and motifs critical for GPR81 functions. *Mol*  
450 *Pharmacol* 2011; 80:848-58.
- 451 35. Marchler-Bauer A, Bo Y, Han L, He J, Lanczycki CJ, Lu S, et al. CDD/SPARCLE:  
452 functional classification of proteins via subfamily domain architectures. *Nucleic Acids Res*  
453 2017; 45:D200-D3.
- 454 36. Rougeot J, Torraca V, Zakrzewska A, Kanwal Z, Jansen HJ, Sommer F, et al. RNAseq  
455 Profiling of Leukocyte Populations in Zebrafish Larvae Reveals a cxcl11 Chemokine Gene as  
456 a Marker of Macrophage Polarization During Mycobacterial Infection. *Frontiers in*  
457 *immunology* 2019; 10:832.
- 458 37. Athanasiadis EI, Bothof JG, Andres H, Ferreira L, Lio P, Cvejic A. Single-cell RNA-  
459 sequencing uncovers transcriptional states and fate decisions in haematopoiesis. *Nat Commun*  
460 2017; 8:2045.
- 461 38. Inan MS, Rasoulpour RJ, Yin L, Hubbard AK, Rosenberg DW, Giardina C. The  
462 luminal short-chain fatty acid butyrate modulates NF-kappaB activity in a human colonic  
463 epithelial cell line. *Gastroenterology* 2000; 118:724-34.
- 464 39. Ji J, Shu D, Zheng M, Wang J, Luo C, Wang Y, et al. Microbial metabolite butyrate  
465 facilitates M2 macrophage polarization and function. *Sci Rep* 2016; 6:24838.
- 466 40. Schulthess J, Pandey S, Capitani M, Rue-Albrecht KC, Arnold I, Franchini F, et al.  
467 The Short Chain Fatty Acid Butyrate Imprints an Antimicrobial Program in Macrophages.  
468 *Immunity* 2019; 50:432-45 e7.
- 469 41. Davie JR. Inhibition of histone deacetylase activity by butyrate. *J Nutr* 2003;  
470 133:2485S-93S.
- 471 42. Chang PV, Hao L, Offermanns S, Medzhitov R. The microbial metabolite butyrate  
472 regulates intestinal macrophage function via histone deacetylase inhibition. *Proc Natl Acad*  
473 *Sci U S A* 2014; 111:2247-52.
- 474 43. Miyauchi S, Gopal E, Fei YJ, Ganapathy V. Functional identification of SLC5A8, a  
475 tumor suppressor down-regulated in colon cancer, as a Na(+)-coupled transporter for short-  
476 chain fatty acids. *J Biol Chem* 2004; 279:13293-6.
- 477 44. Ritzhaupt A, Wood IS, Ellis A, Hosie KB, Shirazi-Beechey SP. Identification and  
478 characterization of a monocarboxylate transporter (MCT1) in pig and human colon: its  
479 potential to transport L-lactate as well as butyrate. *J Physiol* 1998; 513 ( Pt 3):719-32.
- 480 45. Borthakur A, Priyamvada S, Kumar A, Natarajan AA, Gill RK, Alrefai WA, et al. A  
481 novel nutrient sensing mechanism underlies substrate-induced regulation of monocarboxylate  
482 transporter-1. *Am J Physiol Gastrointest Liver Physiol* 2012; 303:G1126-33.
- 483 46. Alarcon P, Manosalva C, Conejeros I, Carretta MD, Munoz-Caro T, Silva LMR, et al.  
484 d(-) Lactic Acid-Induced Adhesion of Bovine Neutrophils onto Endothelial Cells Is  
485 Dependent on Neutrophils Extracellular Traps Formation and CD11b Expression. *Front*  
486 *Immunol* 2017; 8:975.
- 487 47. Rawls JF, Mahowald MA, Ley RE, Gordon JI. Reciprocal gut microbiota transplants  
488 from zebrafish and mice to germ-free recipients reveal host habitat selection. *Cell* 2006;  
489 127:423-33.
- 490 48. Provost KA, Smith M, Miller-Larsson A, Gudleski GD, Sethi S. Bacterial regulation  
491 of macrophage bacterial recognition receptors in COPD are differentially modified by  
492 budesonide and fluticasone propionate. *PLoS One* 2019; 14:e0207675.

- 493 49. Ciarlo E, Heinonen T, Herderschee J, Fenwick C, Mombelli M, Le Roy D, et al.  
494 Impact of the microbial derived short chain fatty acid propionate on host susceptibility to  
495 bacterial and fungal infections in vivo. *Sci Rep* 2016; 6:37944.  
496 50. Park JW, Kim HY, Kim MG, Jeong S, Yun CH, Han SH. Short-chain Fatty Acids  
497 Inhibit Staphylococcal Lipoprotein-induced Nitric Oxide Production in Murine Macrophages.  
498 *Immune Netw* 2019; 19:e9.  
499 51. Hoseinifar SH, Zoheiri F, Caipang CM. Dietary sodium propionate improved  
500 performance, mucosal and humoral immune responses in Caspian white fish (*Rutilus frisii*  
501 *kutum*) fry. *Fish Shellfish Immunol* 2016; 55:523-8.  
502 52. Safari R, Hoseinifar SH, Kavandi M. Modulation of antioxidant defense and immune  
503 response in zebra fish (*Danio rerio*) using dietary sodium propionate. *Fish Physiol Biochem*  
504 2016; 42:1733-9.  
505

## 506 **Figure Legends**

### 507 **Figure 1: In vitro synthesis of SCFA by zebrafish gut microbiota**

508 Concentrations of short-chain fatty acids (SCFA) synthesized by conventional microbiota  
509 harvested from adult zebrafish intestines. SCFA content of nutrient media used to culture  
510 microbes is provided under “Negative”. Asterisks indicate measurements within the range of  
511 standards. Error bars are shown as mean  $\pm$  SE, n = 2. Bars without an asterisk indicate  
512 concentrations that were outside the standard range but were detectable.

513

### 514 **Figure 2: Butyrate reduces the recruitment of zebrafish neutrophils to a wound**

515 (A) Cartoon describing the standard cut site transecting the dorsal aorta and cardinal vein of a  
516 5 dpf zebrafish embryo, and the fin cut site used for live imaging studies. (B) Neutrophil  
517 counts at 6 hpw. Each dot represents a single embryo. (C) Velocity of wound-recruited  
518 neutrophils calculated from live imaging studies. Each dot represents the average of 10  
519 neutrophils from a single embryo. (C) Meandering index (Total distance/Euclidean distance)  
520 of wound-recruited neutrophils calculated from live imaging studies. Each dot represents the  
521 average of 10 neutrophils from a single embryo. (D) Neutrophil count at 6 hpw in 2 dpf  
522 zebrafish.

523

524 **Figure 3: Butyrate reduces macrophage recruitment to the wound site and pro-**  
525 **inflammatory differentiation.**

526 (A) Macrophage fluorescent area at 6 hpw. (B) Macrophage fluorescent area at 24 hpw. (C)  
527 Total TNF promotor fluorescent area at the wound site after 24 hpw. (D) Representative  
528 images of double transgenic red macrophage, green TNF promoter activity embryos tail  
529 wounds at 24 hpw. Scale bar represents 100  $\mu$ m. (D) Quantification of wound site TNF  
530 expressing macrophages at 24 hpw.

531

532 **Figure 4: Characterization of zebrafish hydrocarboxylic acid receptor 1 and**  
533 **responsiveness to butyrate.**

534 (A) Synteny diagram illustrating *HCAR1* in a conserved region of human chromosome 12,  
535 mouse chromosome 5, and zebrafish chromosome 10. (B) Quantification of *hcar1* expression  
536 in dissected gut and body of zebrafish embryos. Each dot represents a biological replicate of  
537 at least 10 embryos. (C) Quantification of *hcar1* expression in 5 dpf embryos injected with  
538 *hcar1*-targeting Crispr-Cas9 complexes. Each dot represents a biological replicate of at least  
539 10 embryos. (D) Morphology of the control and crisprant embryos. Scale bar represents 100  
540  $\mu$ m. (E) Quantification of neutrophil area at 6 hpw in control and crisprant embryos exposed to  
541 butyrate by immersion. (E) Quantification of macrophage area at 6 hpw in control and  
542 crisprant embryos exposed to butyrate at 6 hpw. (F) Total TNF promotor-driven fluorescent  
543 area at the wound site at 24 hpw.

544

545 **Supplementary Figure 1: Effects of SCFA administration on zebrafish hemostasis.**

546 (A) Clotting at 2 hpw following a tail wound in 5 dpf zebrafish. (B) Thrombosis at 3 hpw  
547 following a tail wound in 5 dpf zebrafish.

548

549 **Supplementary Figure 2: Expression of *hcar1* in germ-free embryos**

550 Quantification of *hcar1* expression in guts and bodies dissected from conventionally raised

551 and germ-free embryos.

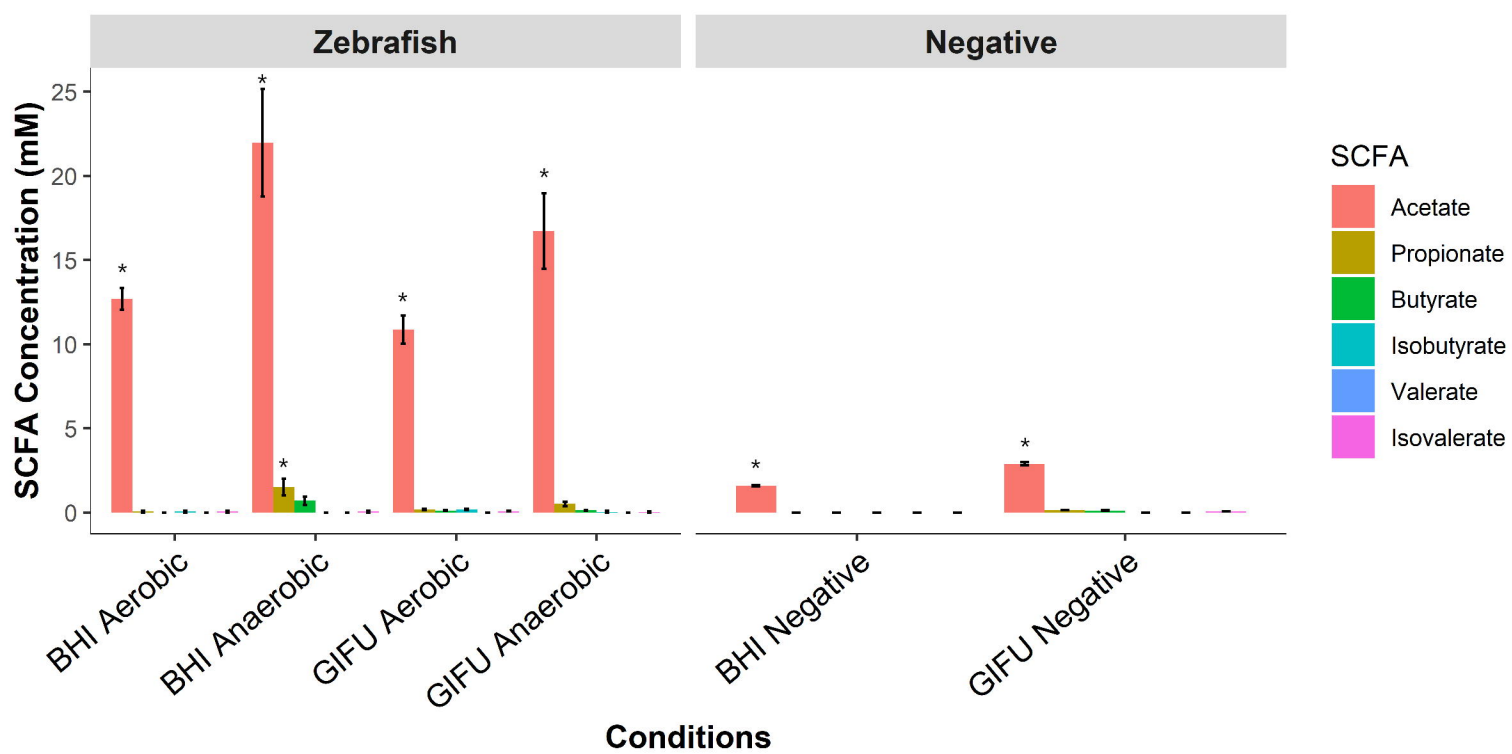

**A**

Standard cut site

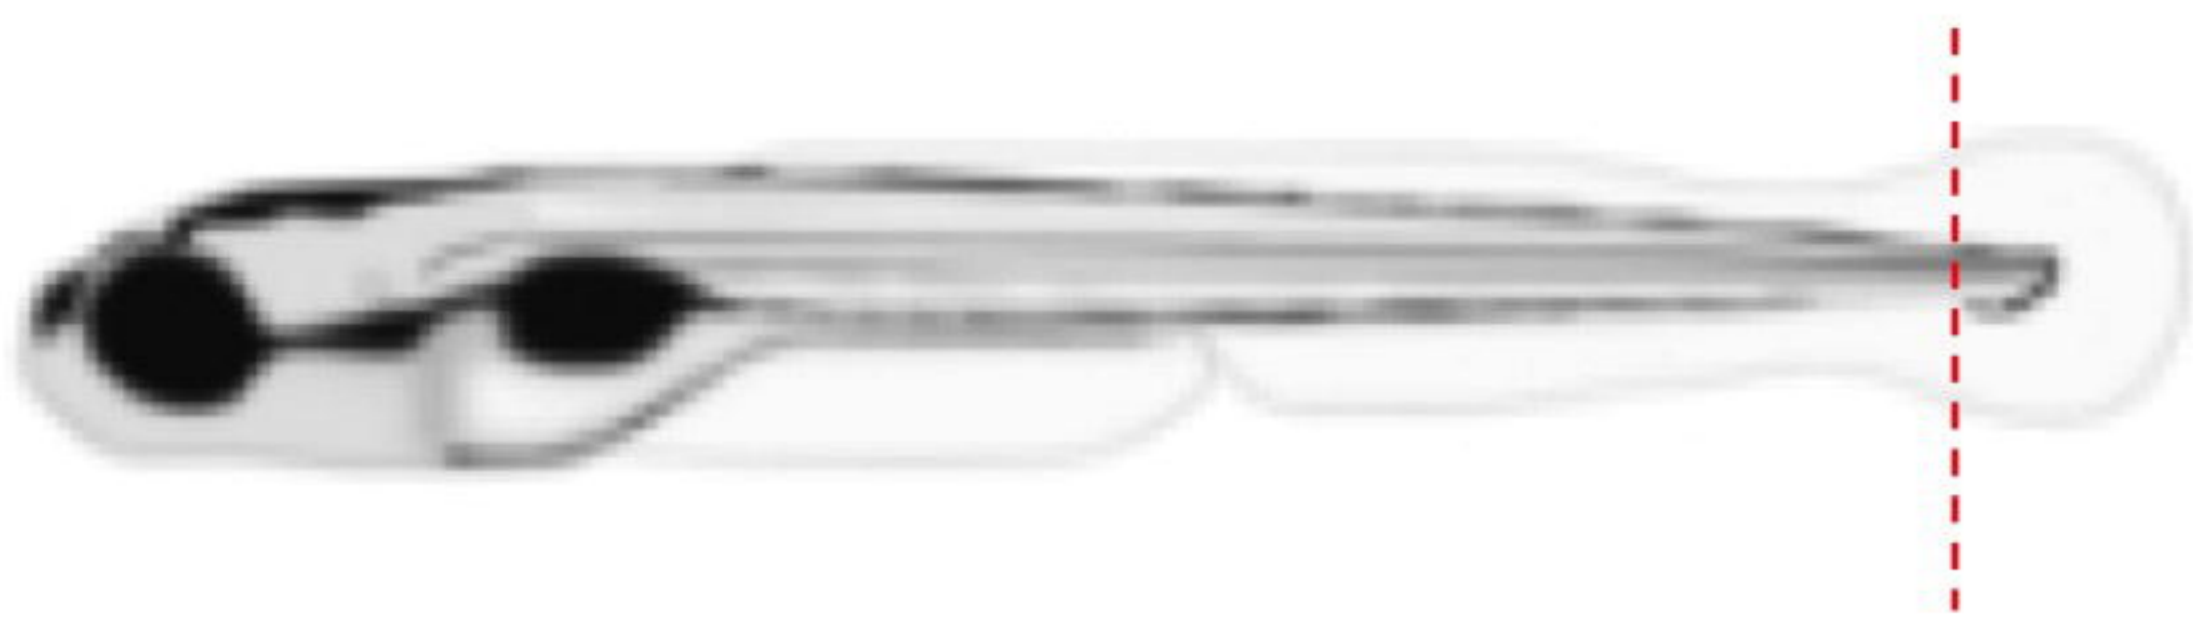

Fin cut site for live imaging

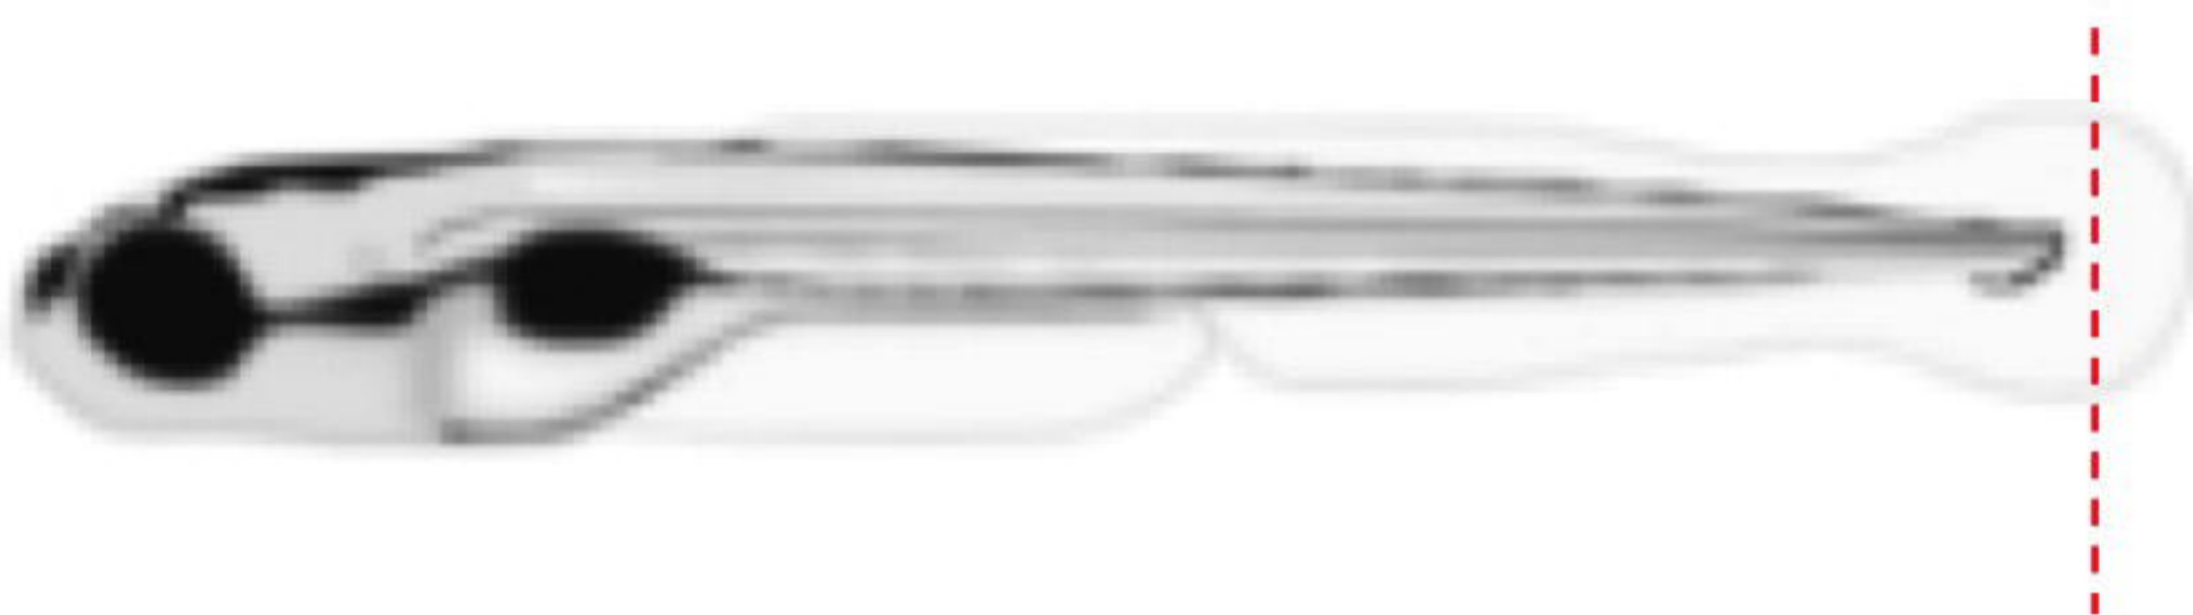**B**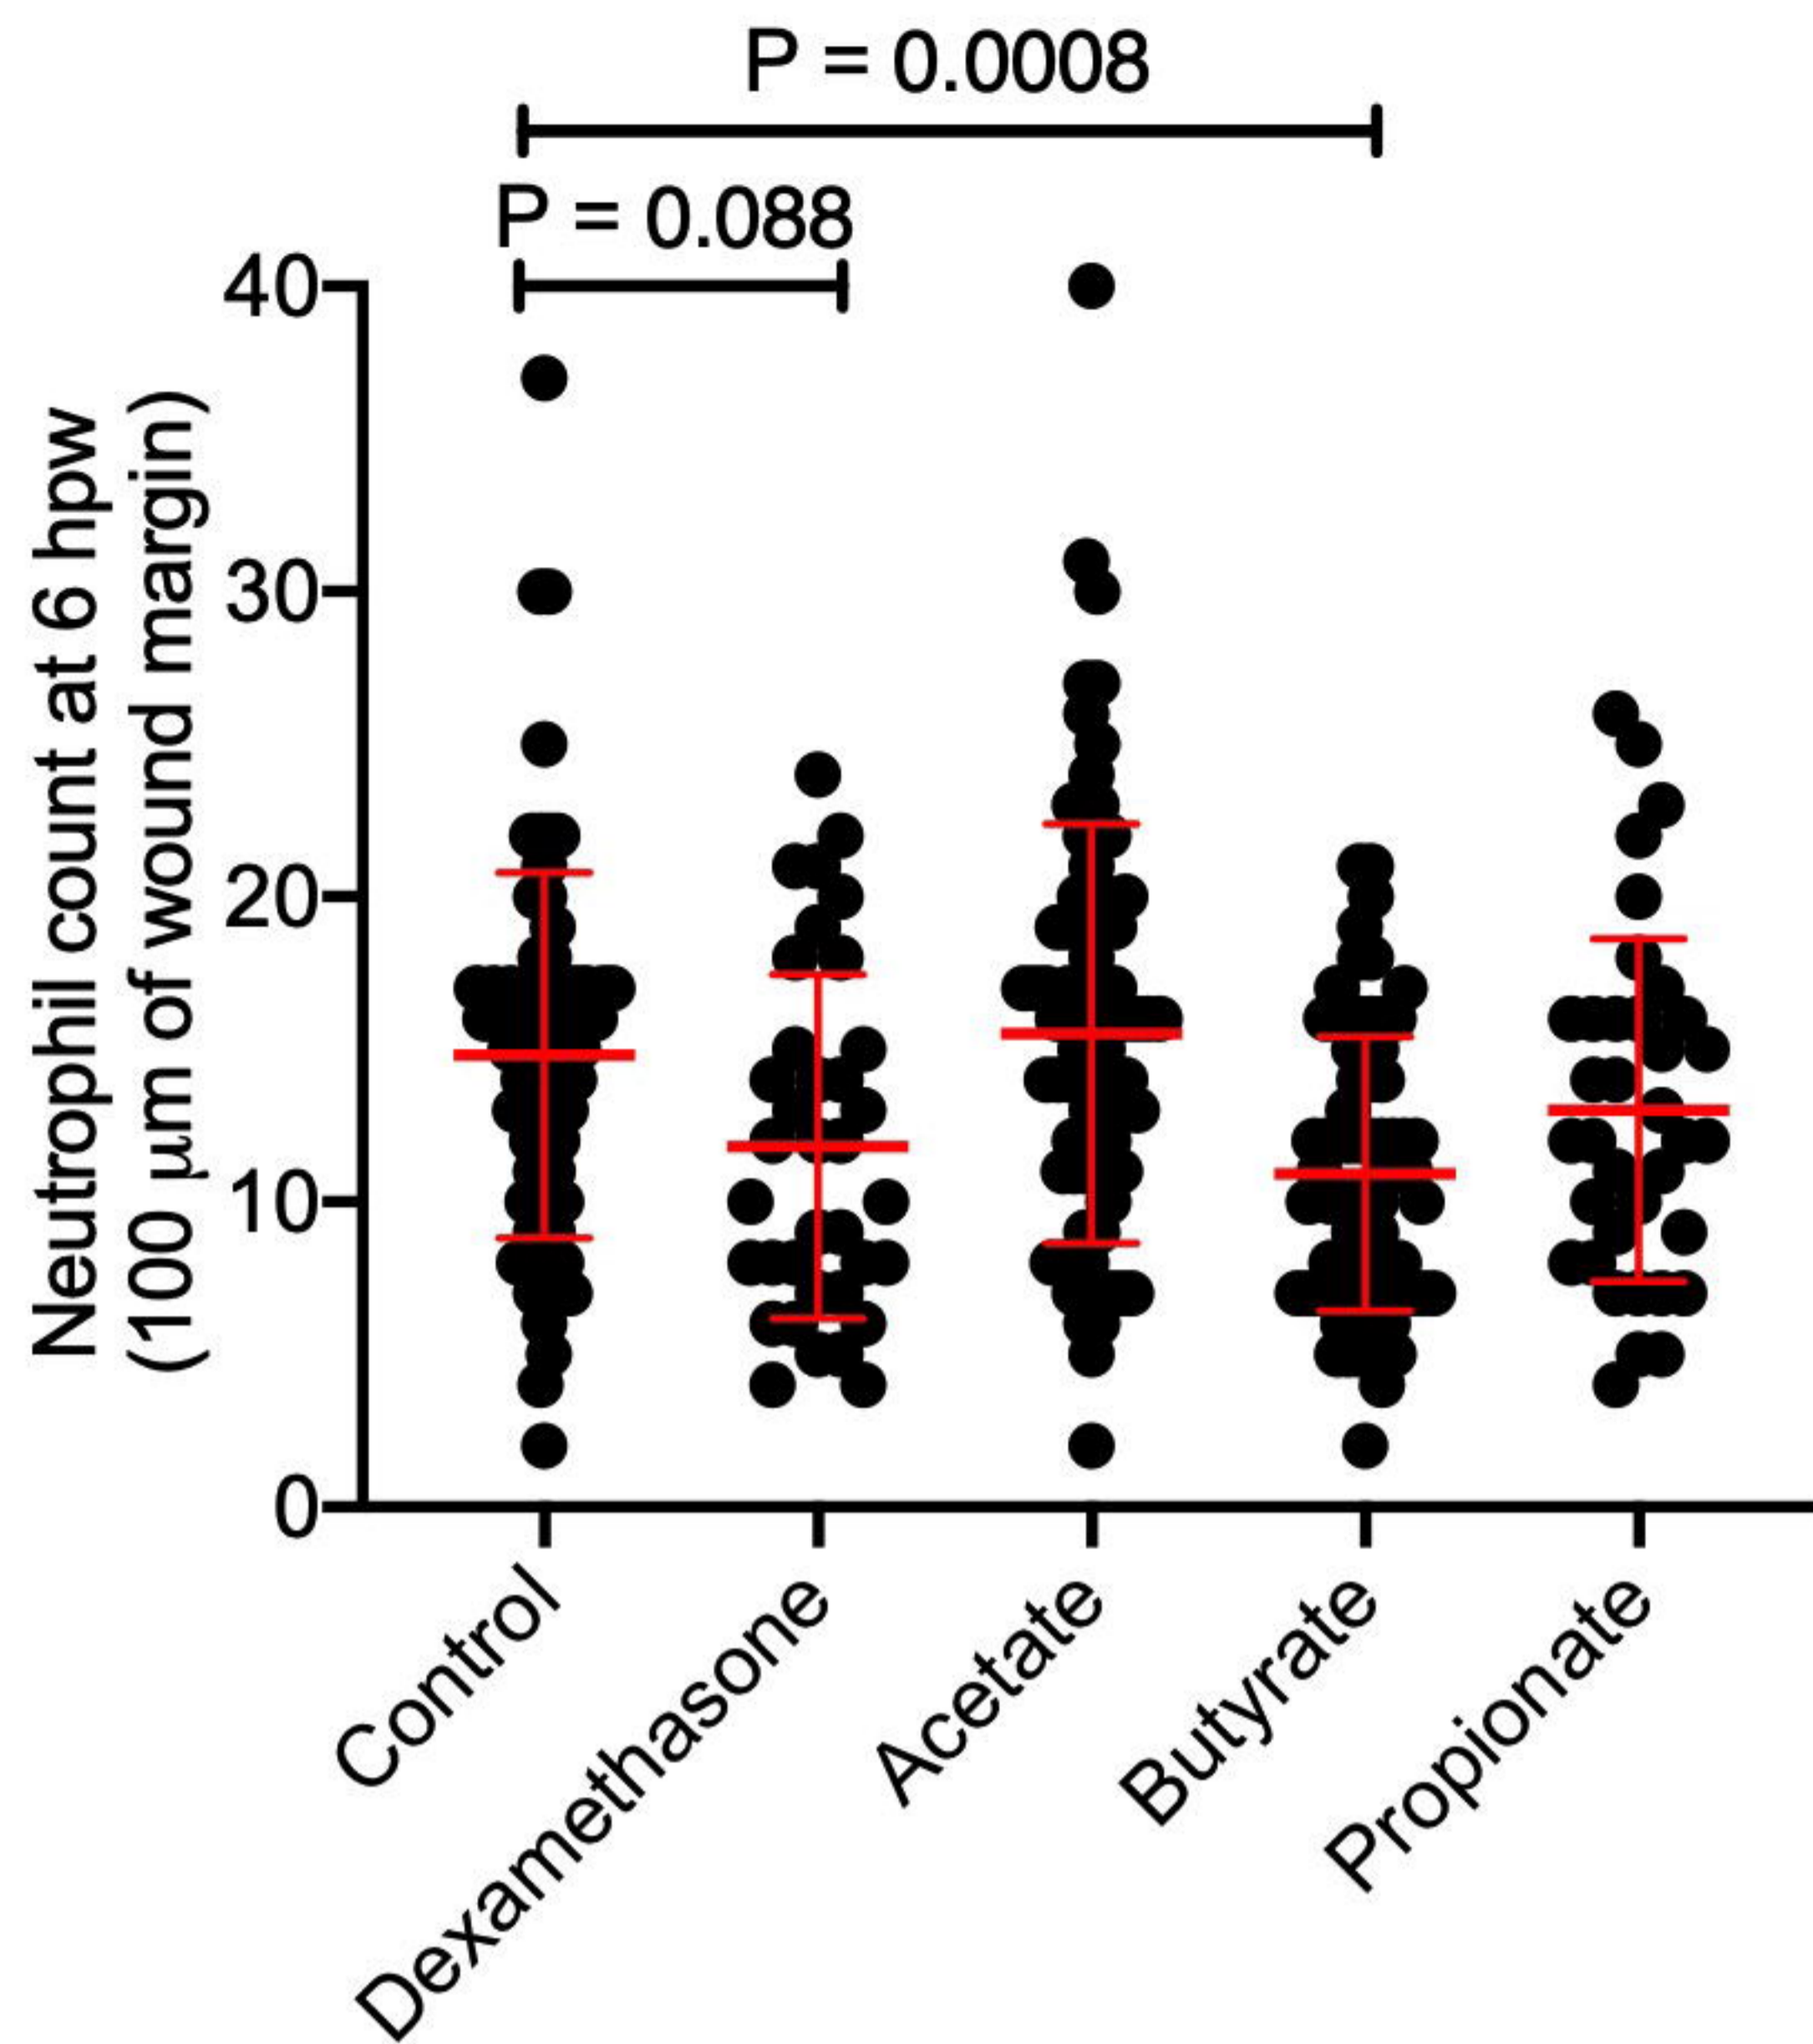**C**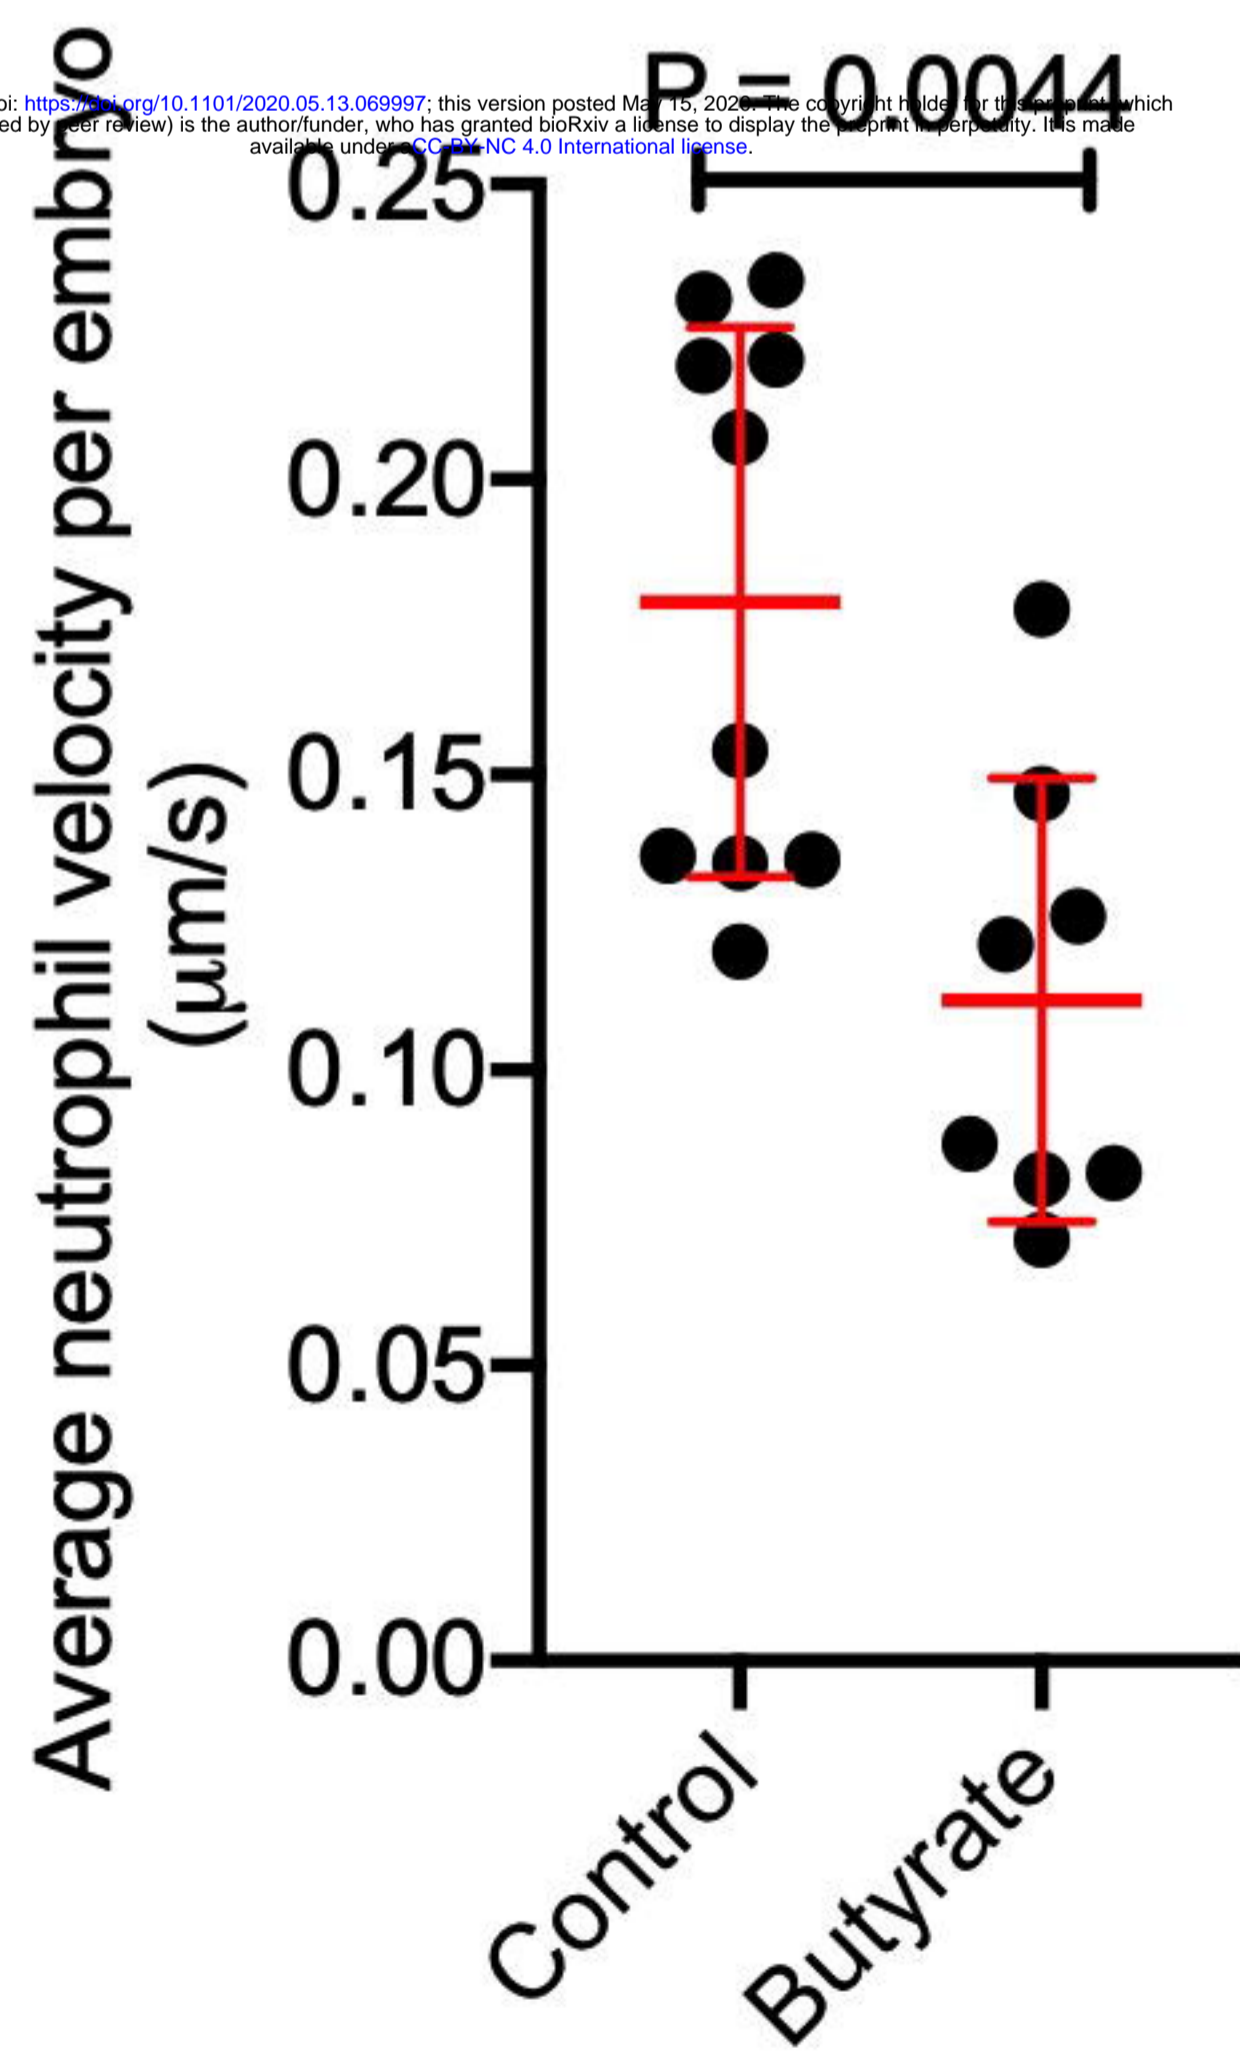**D**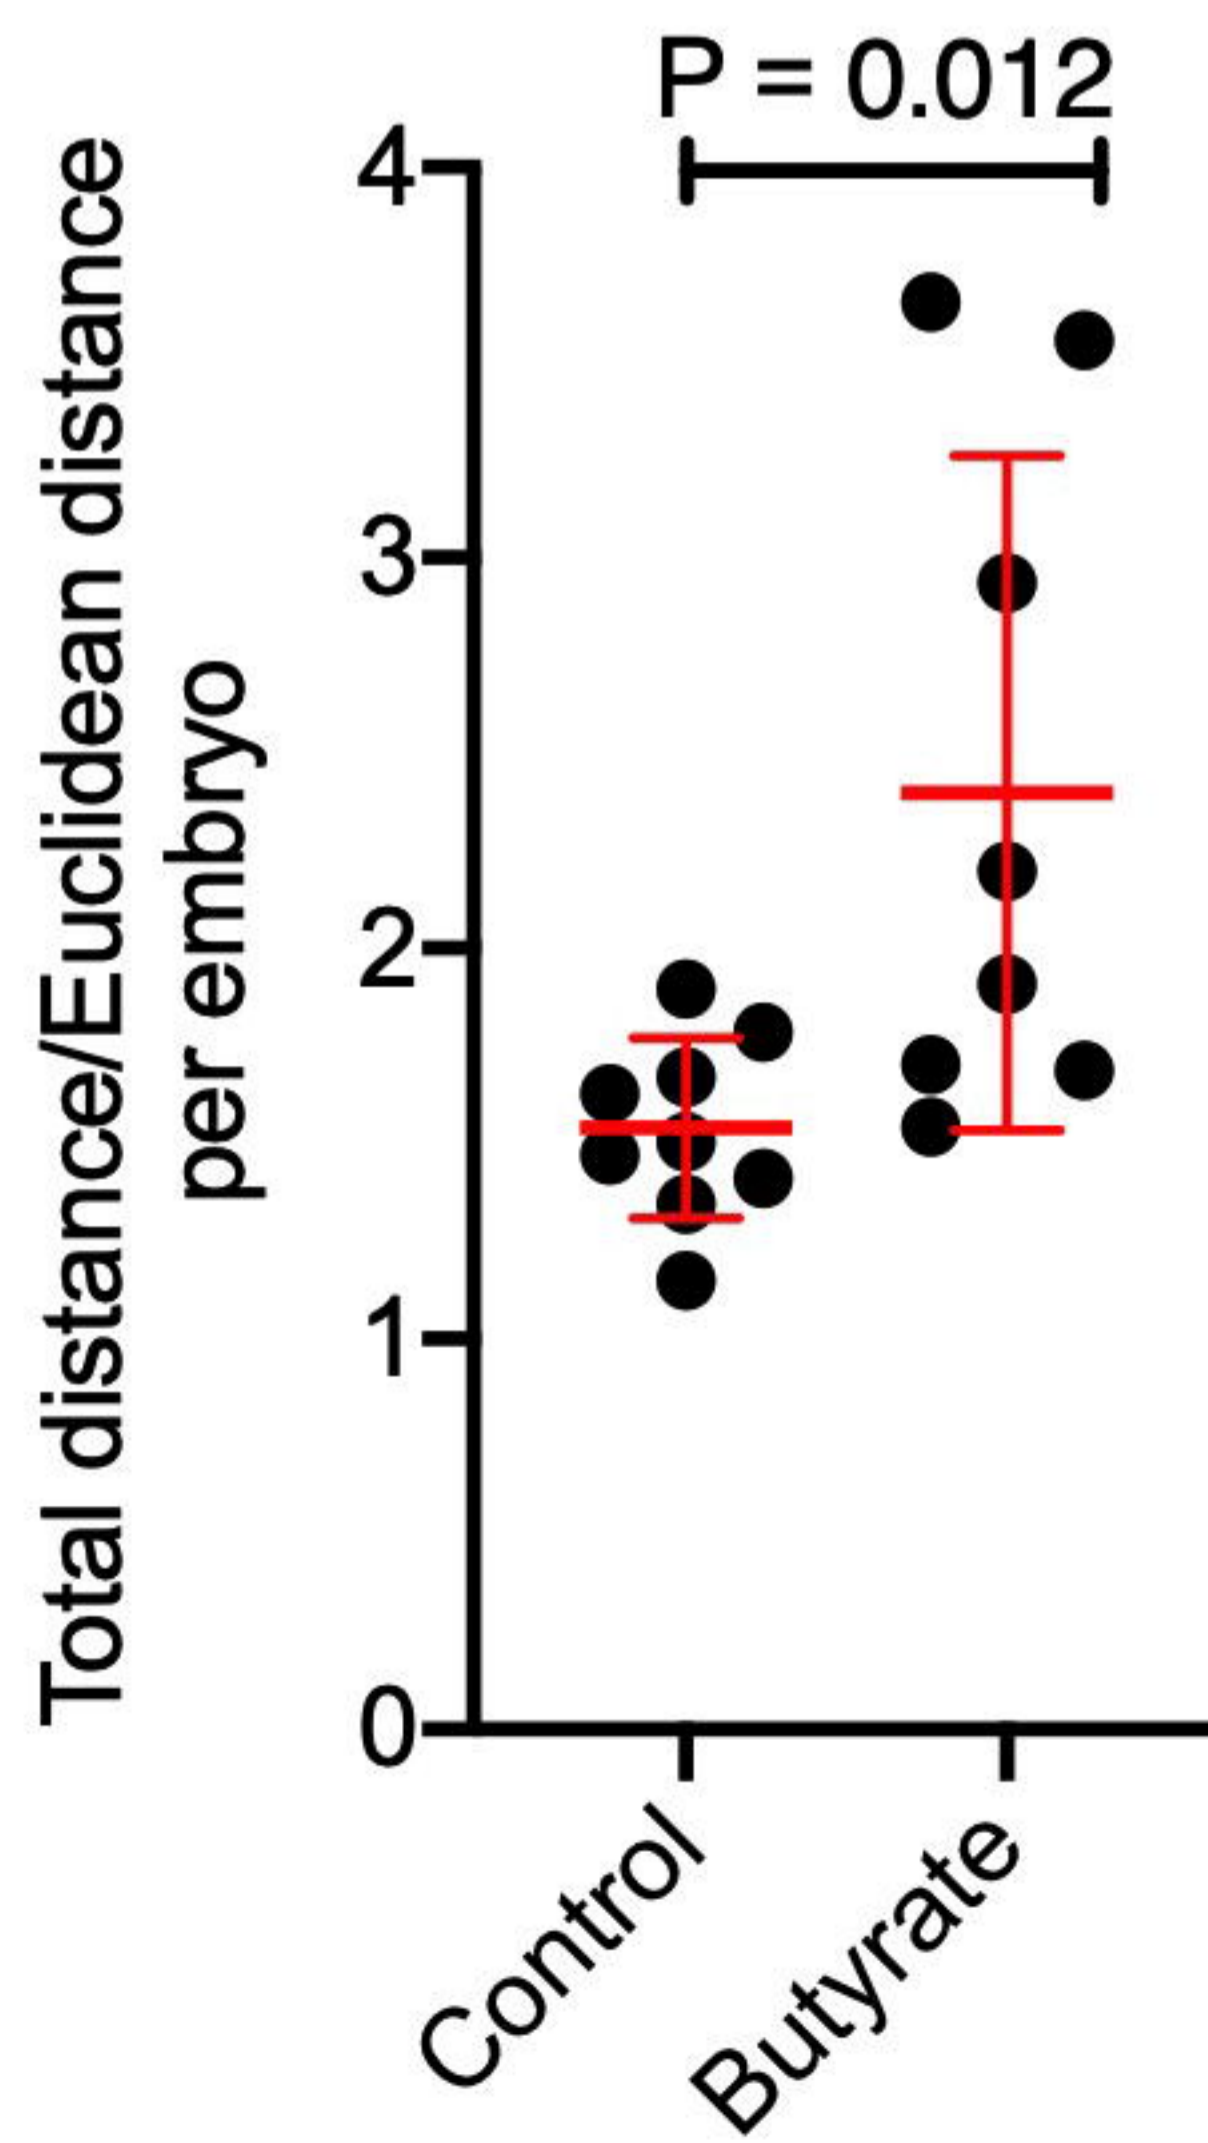**E**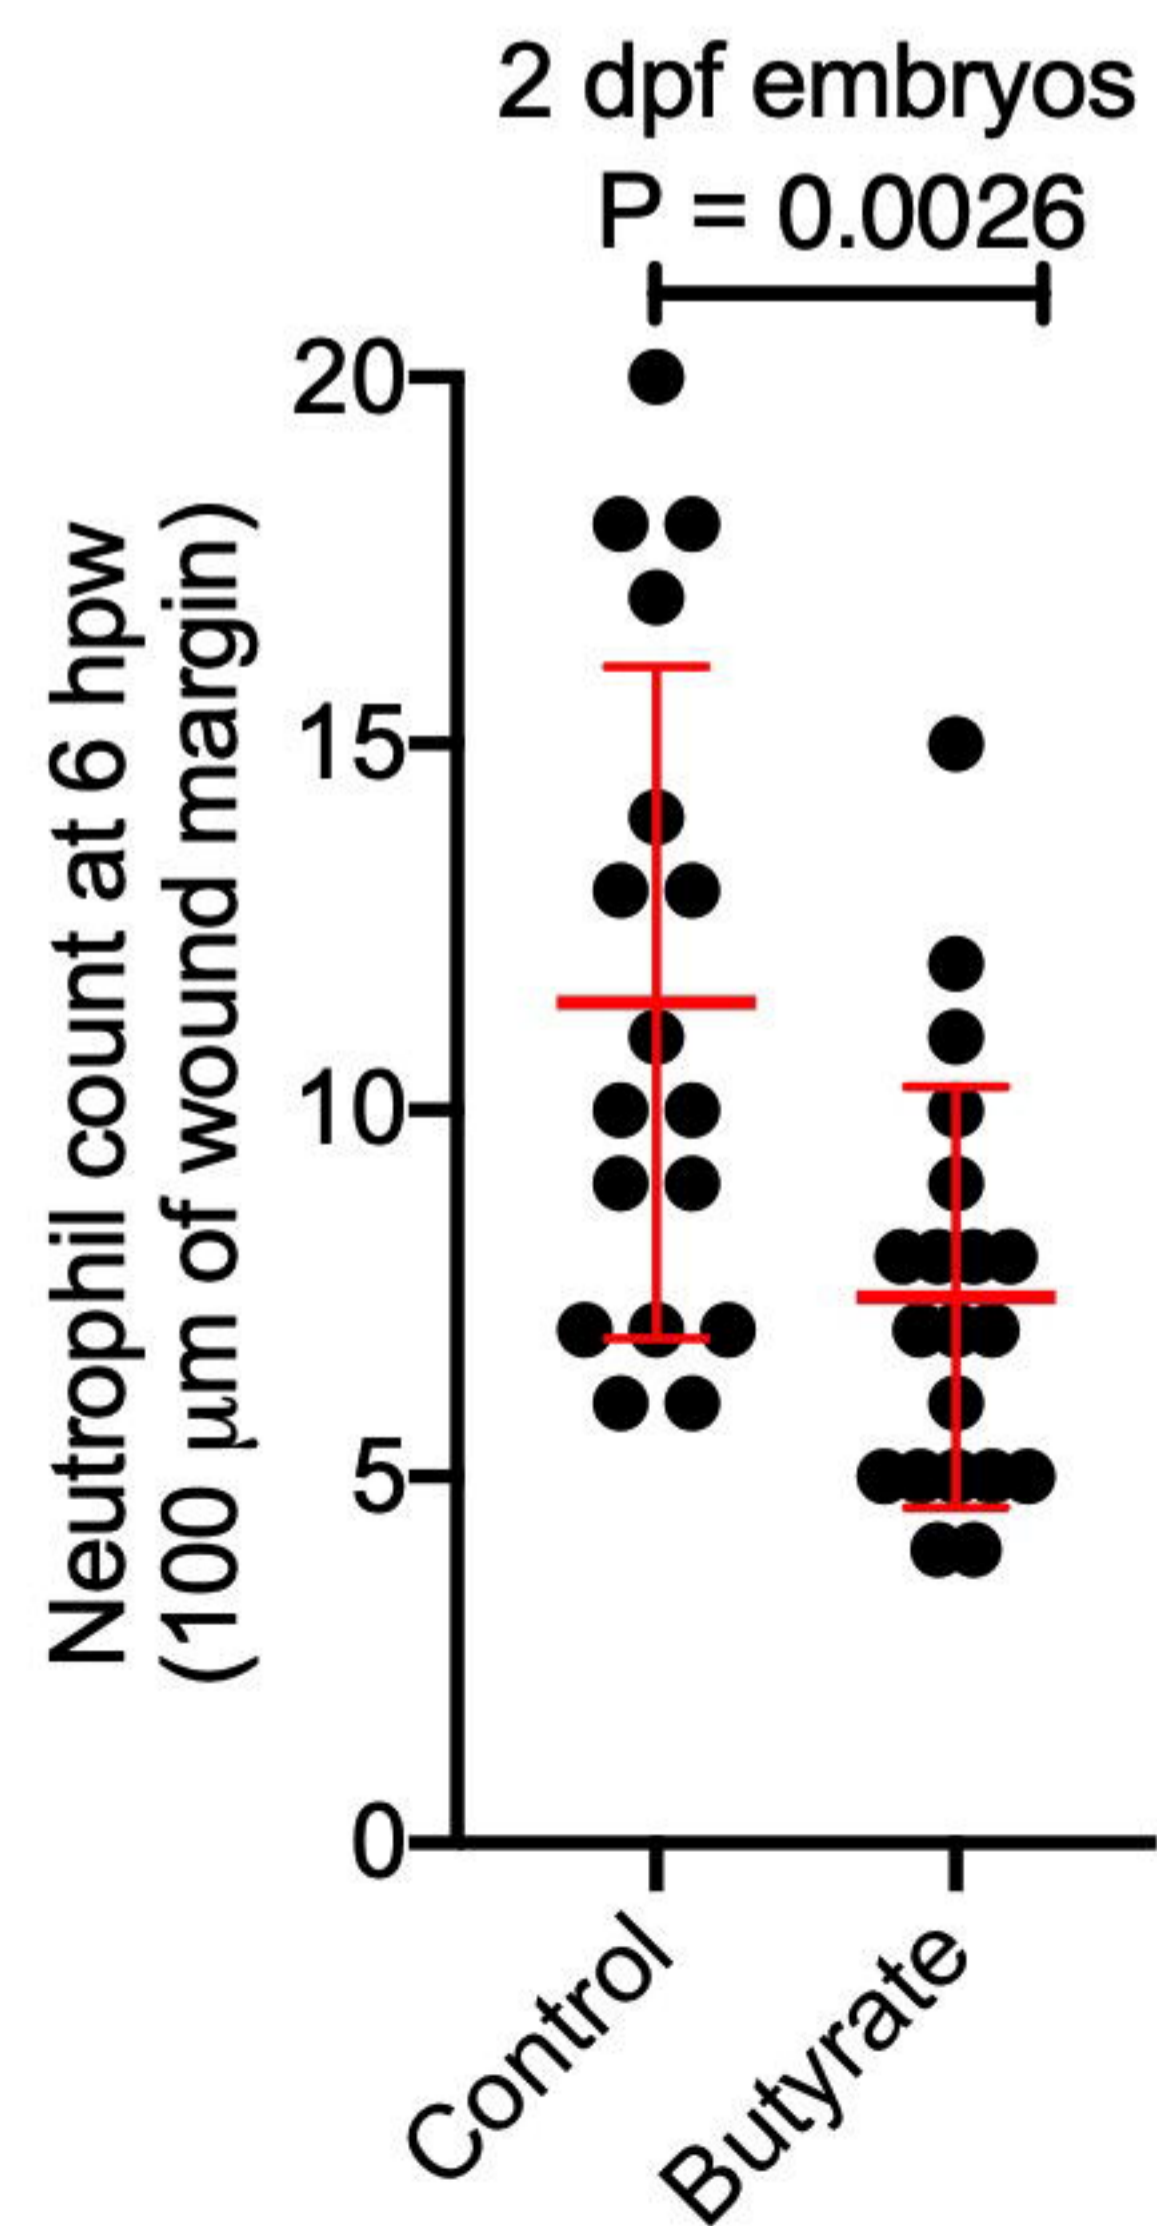

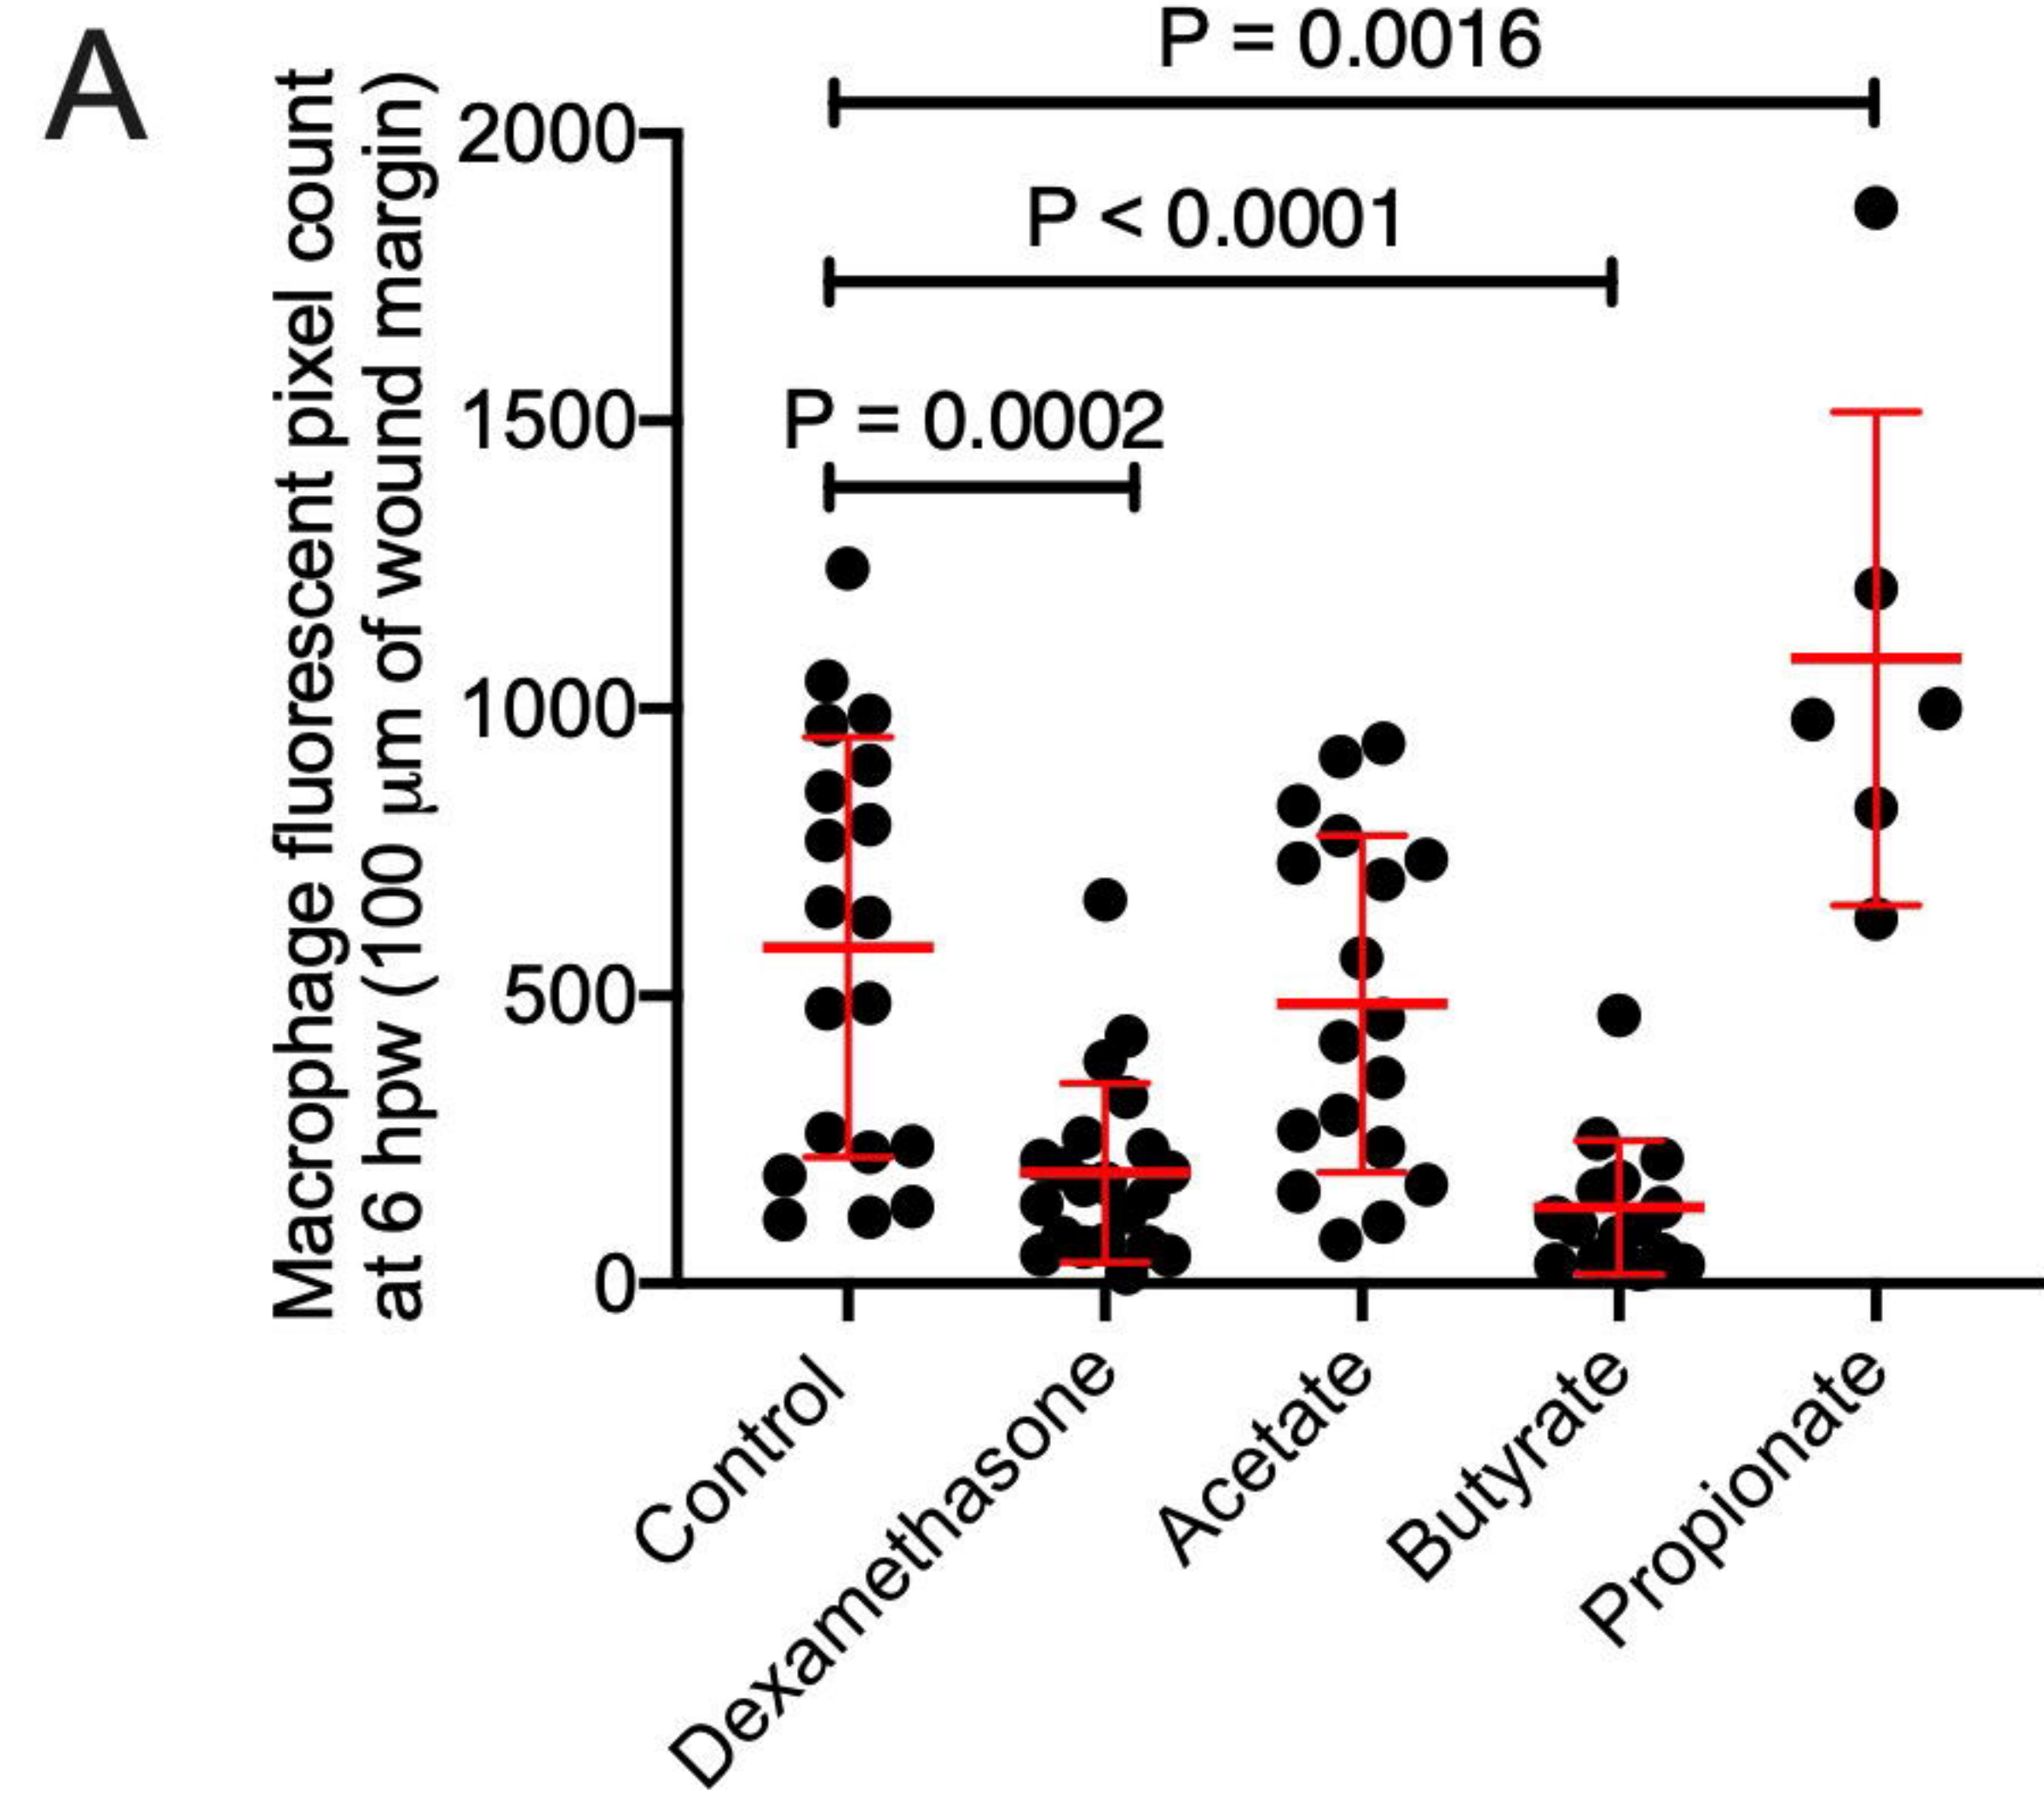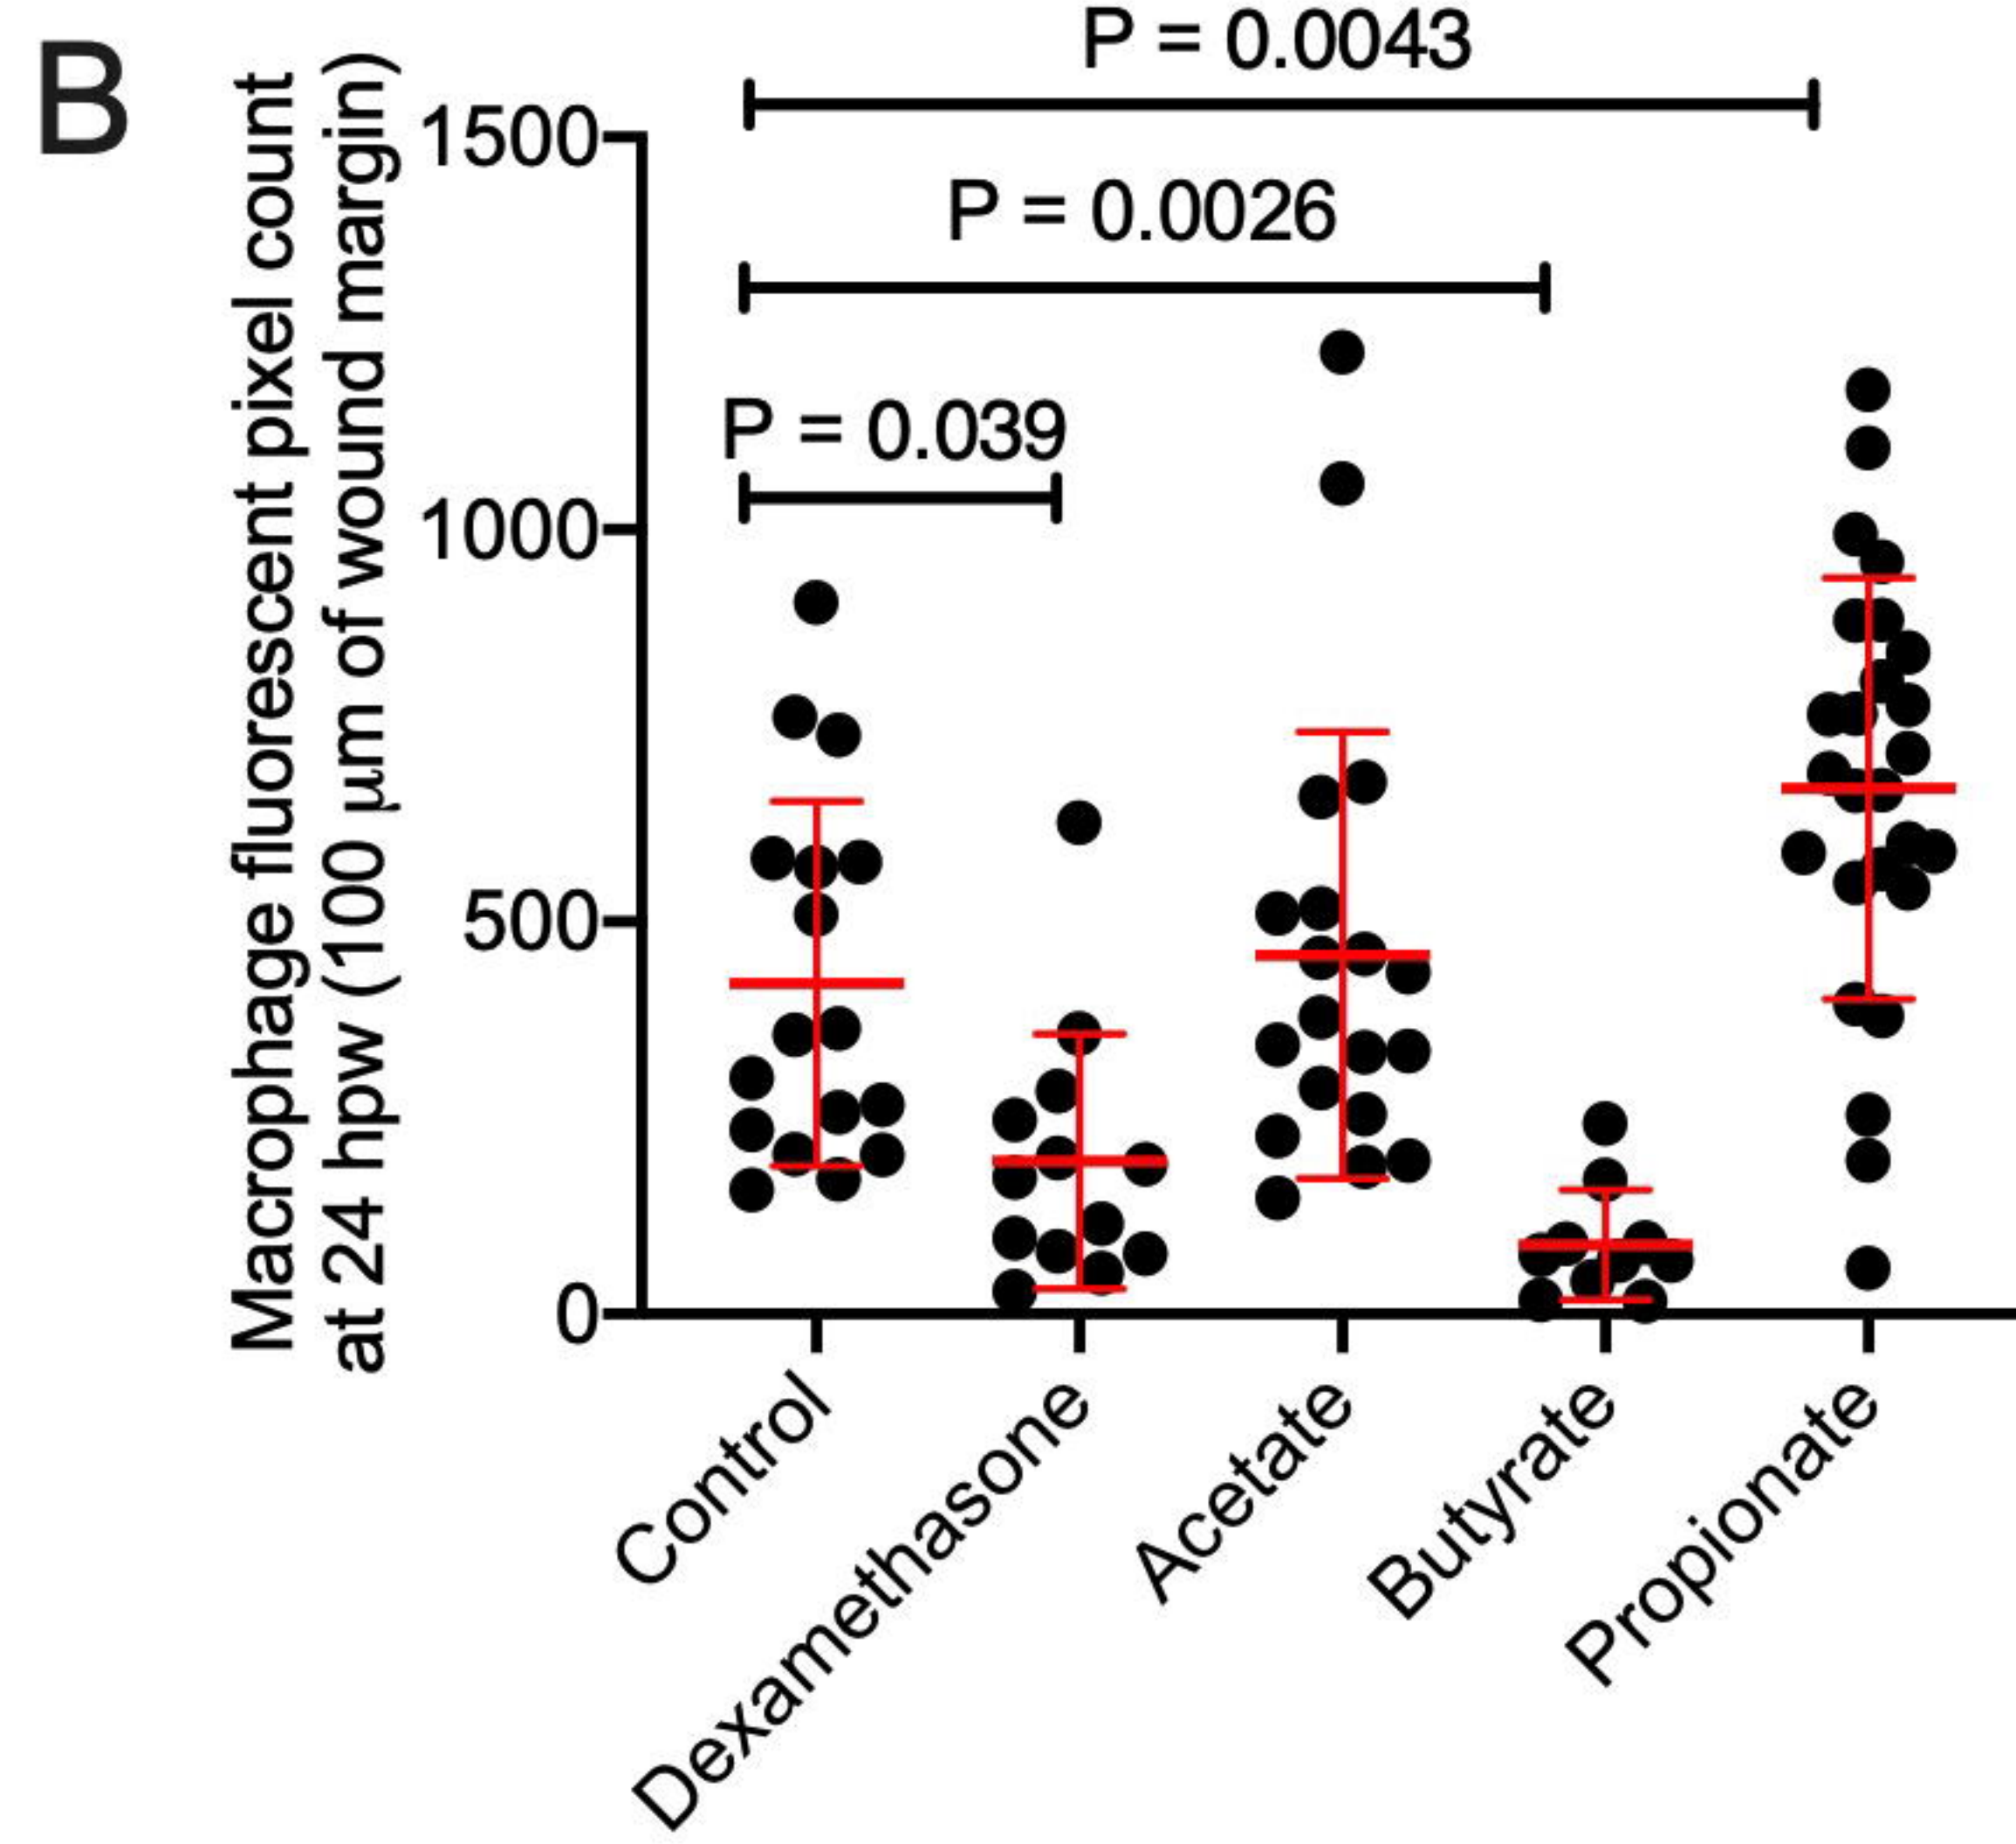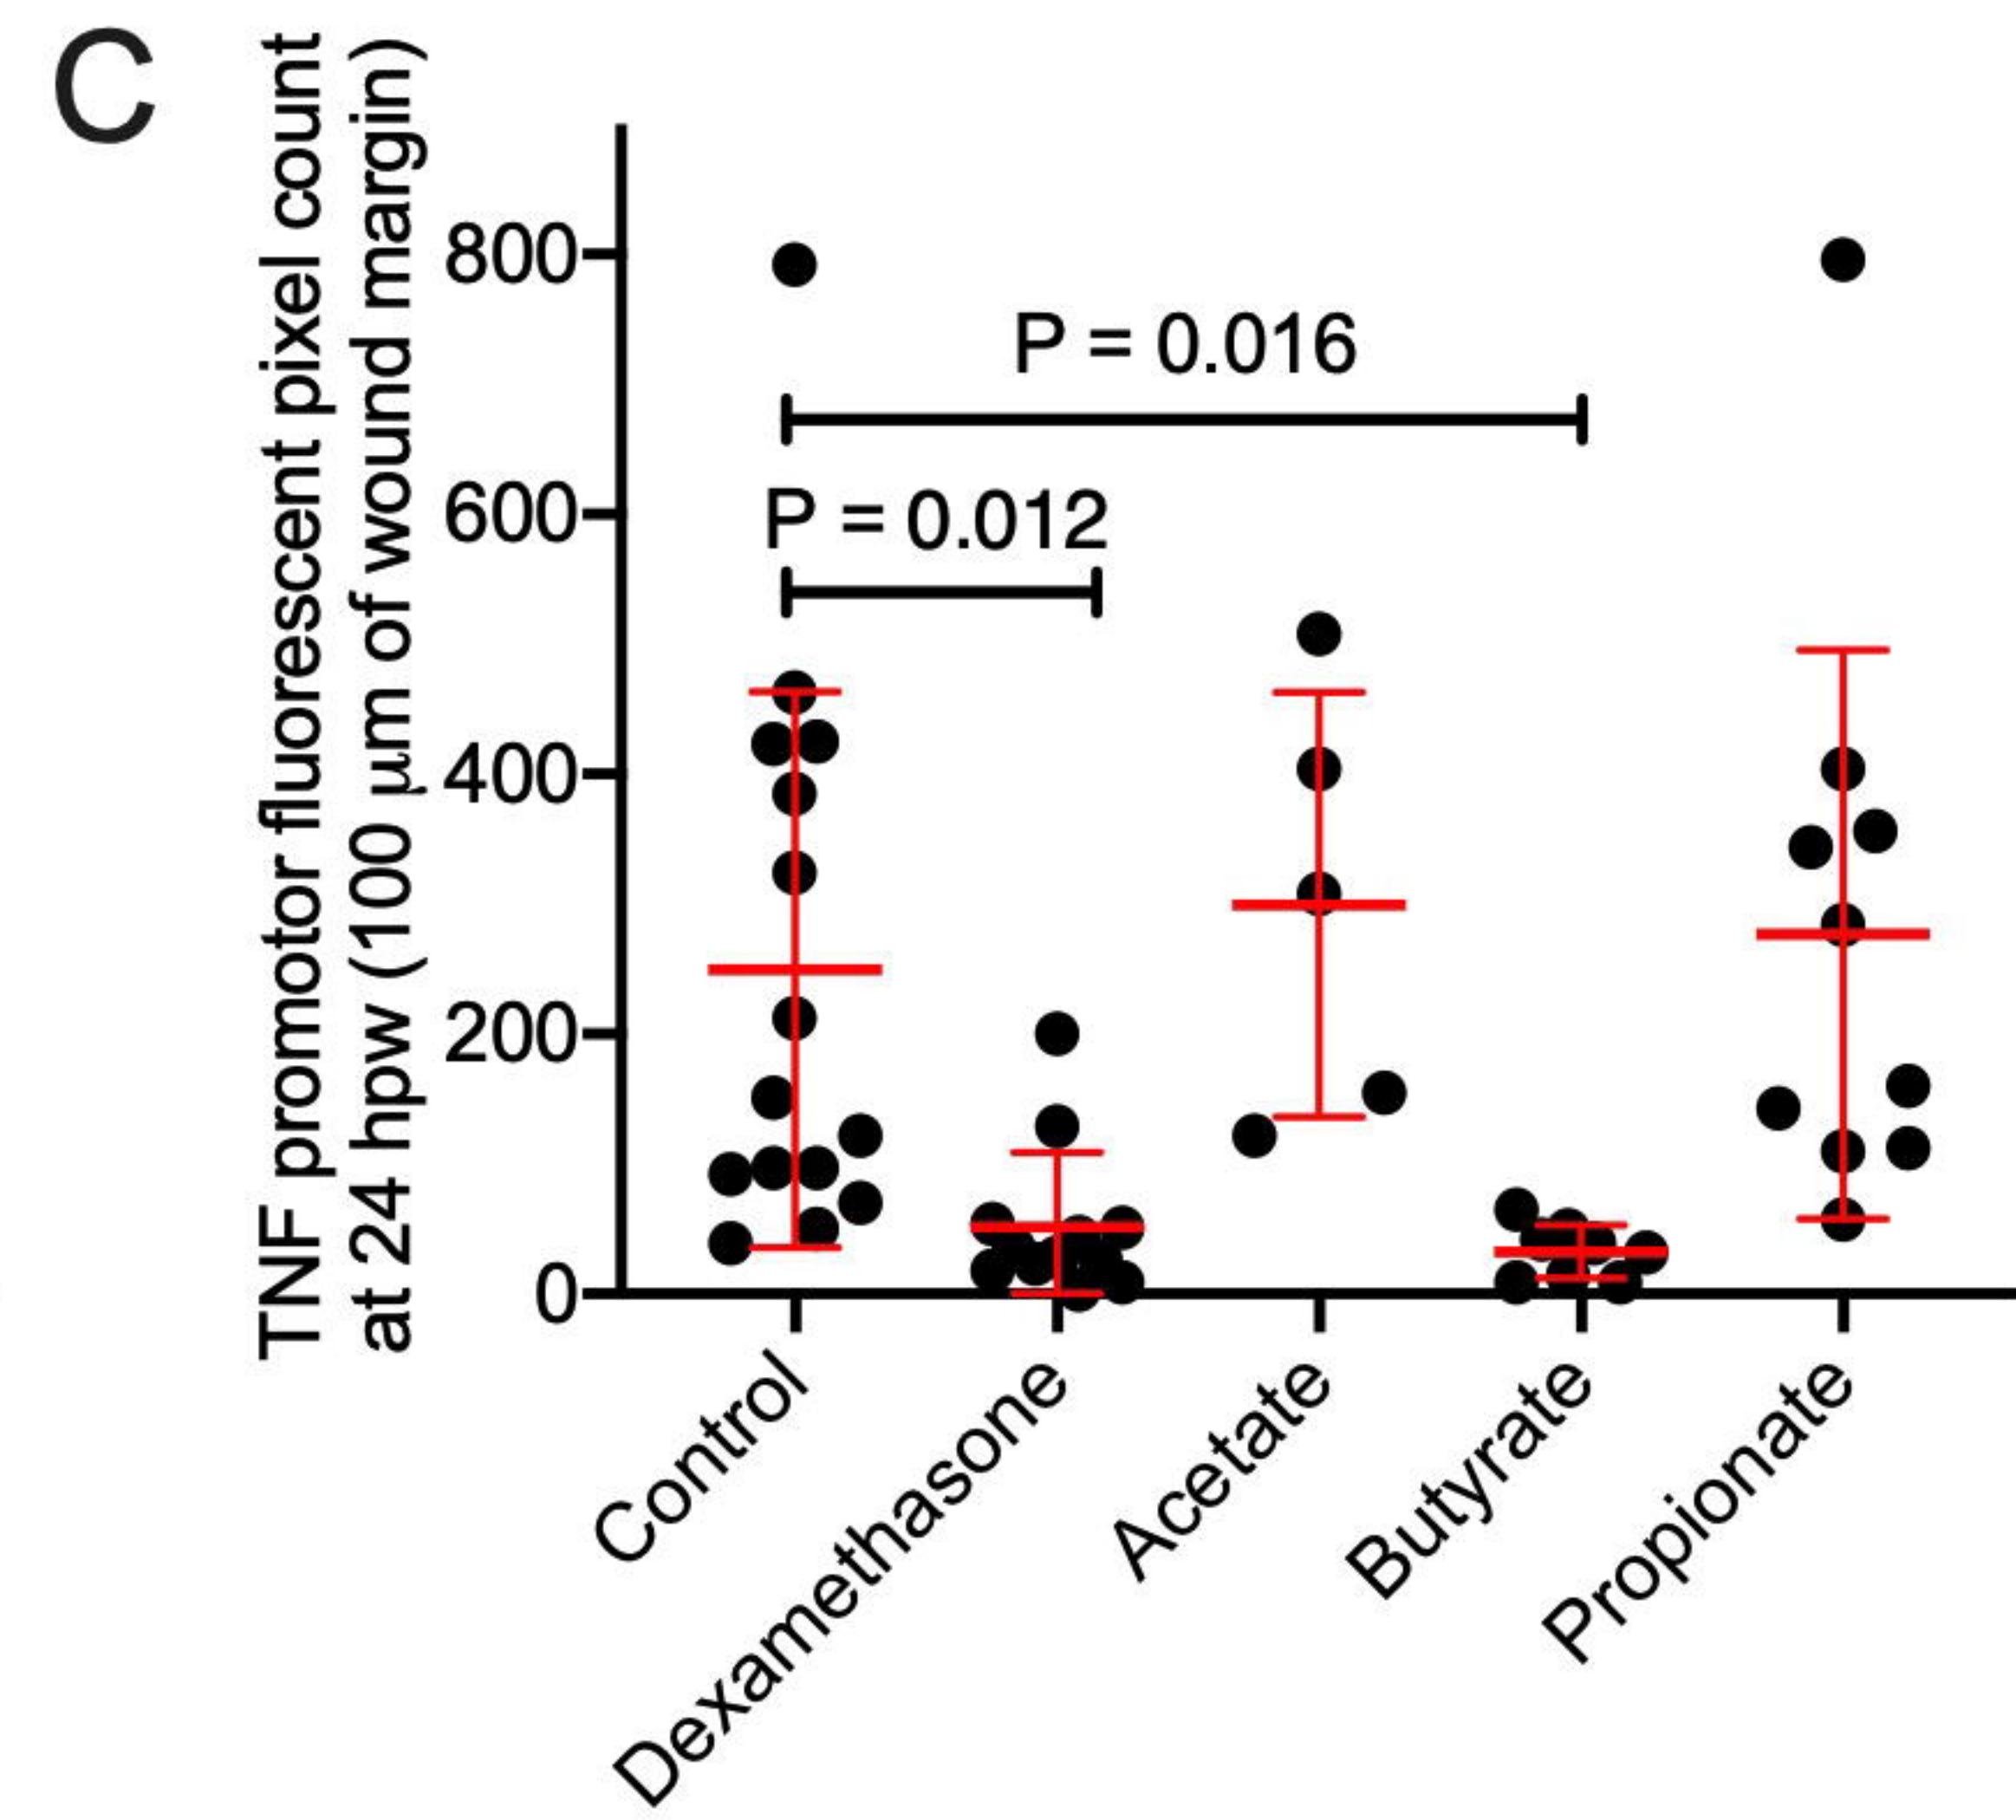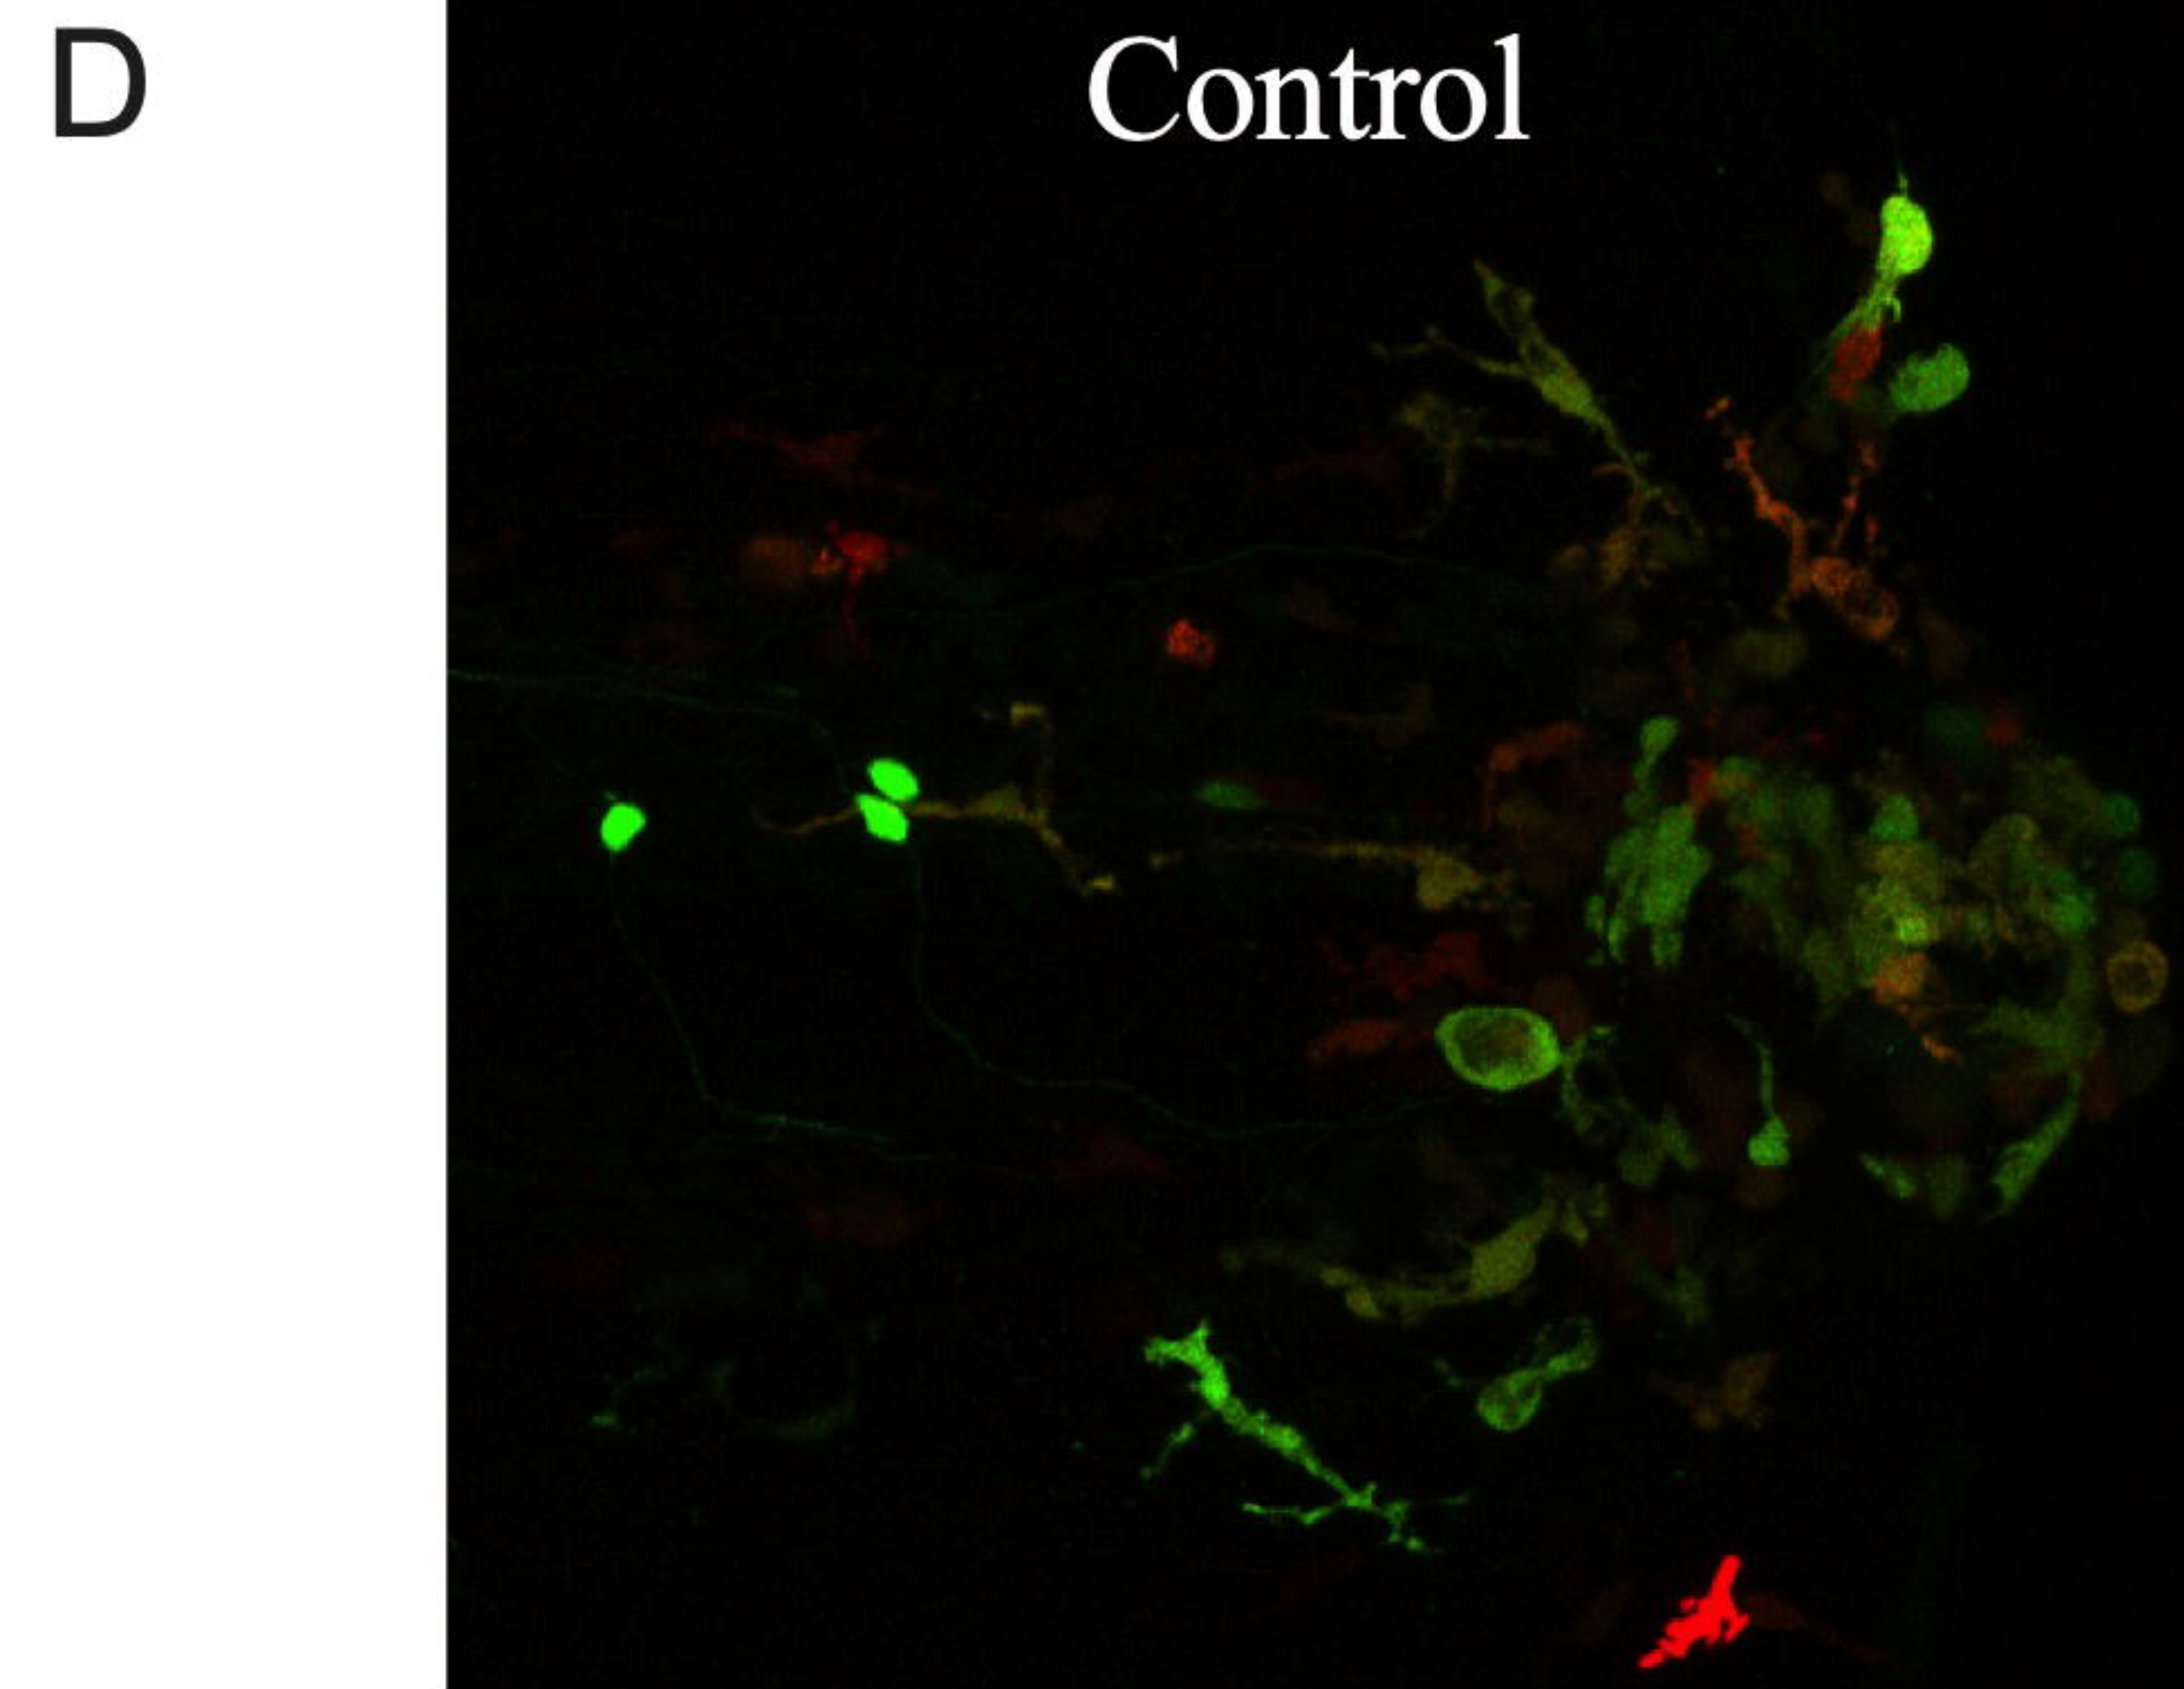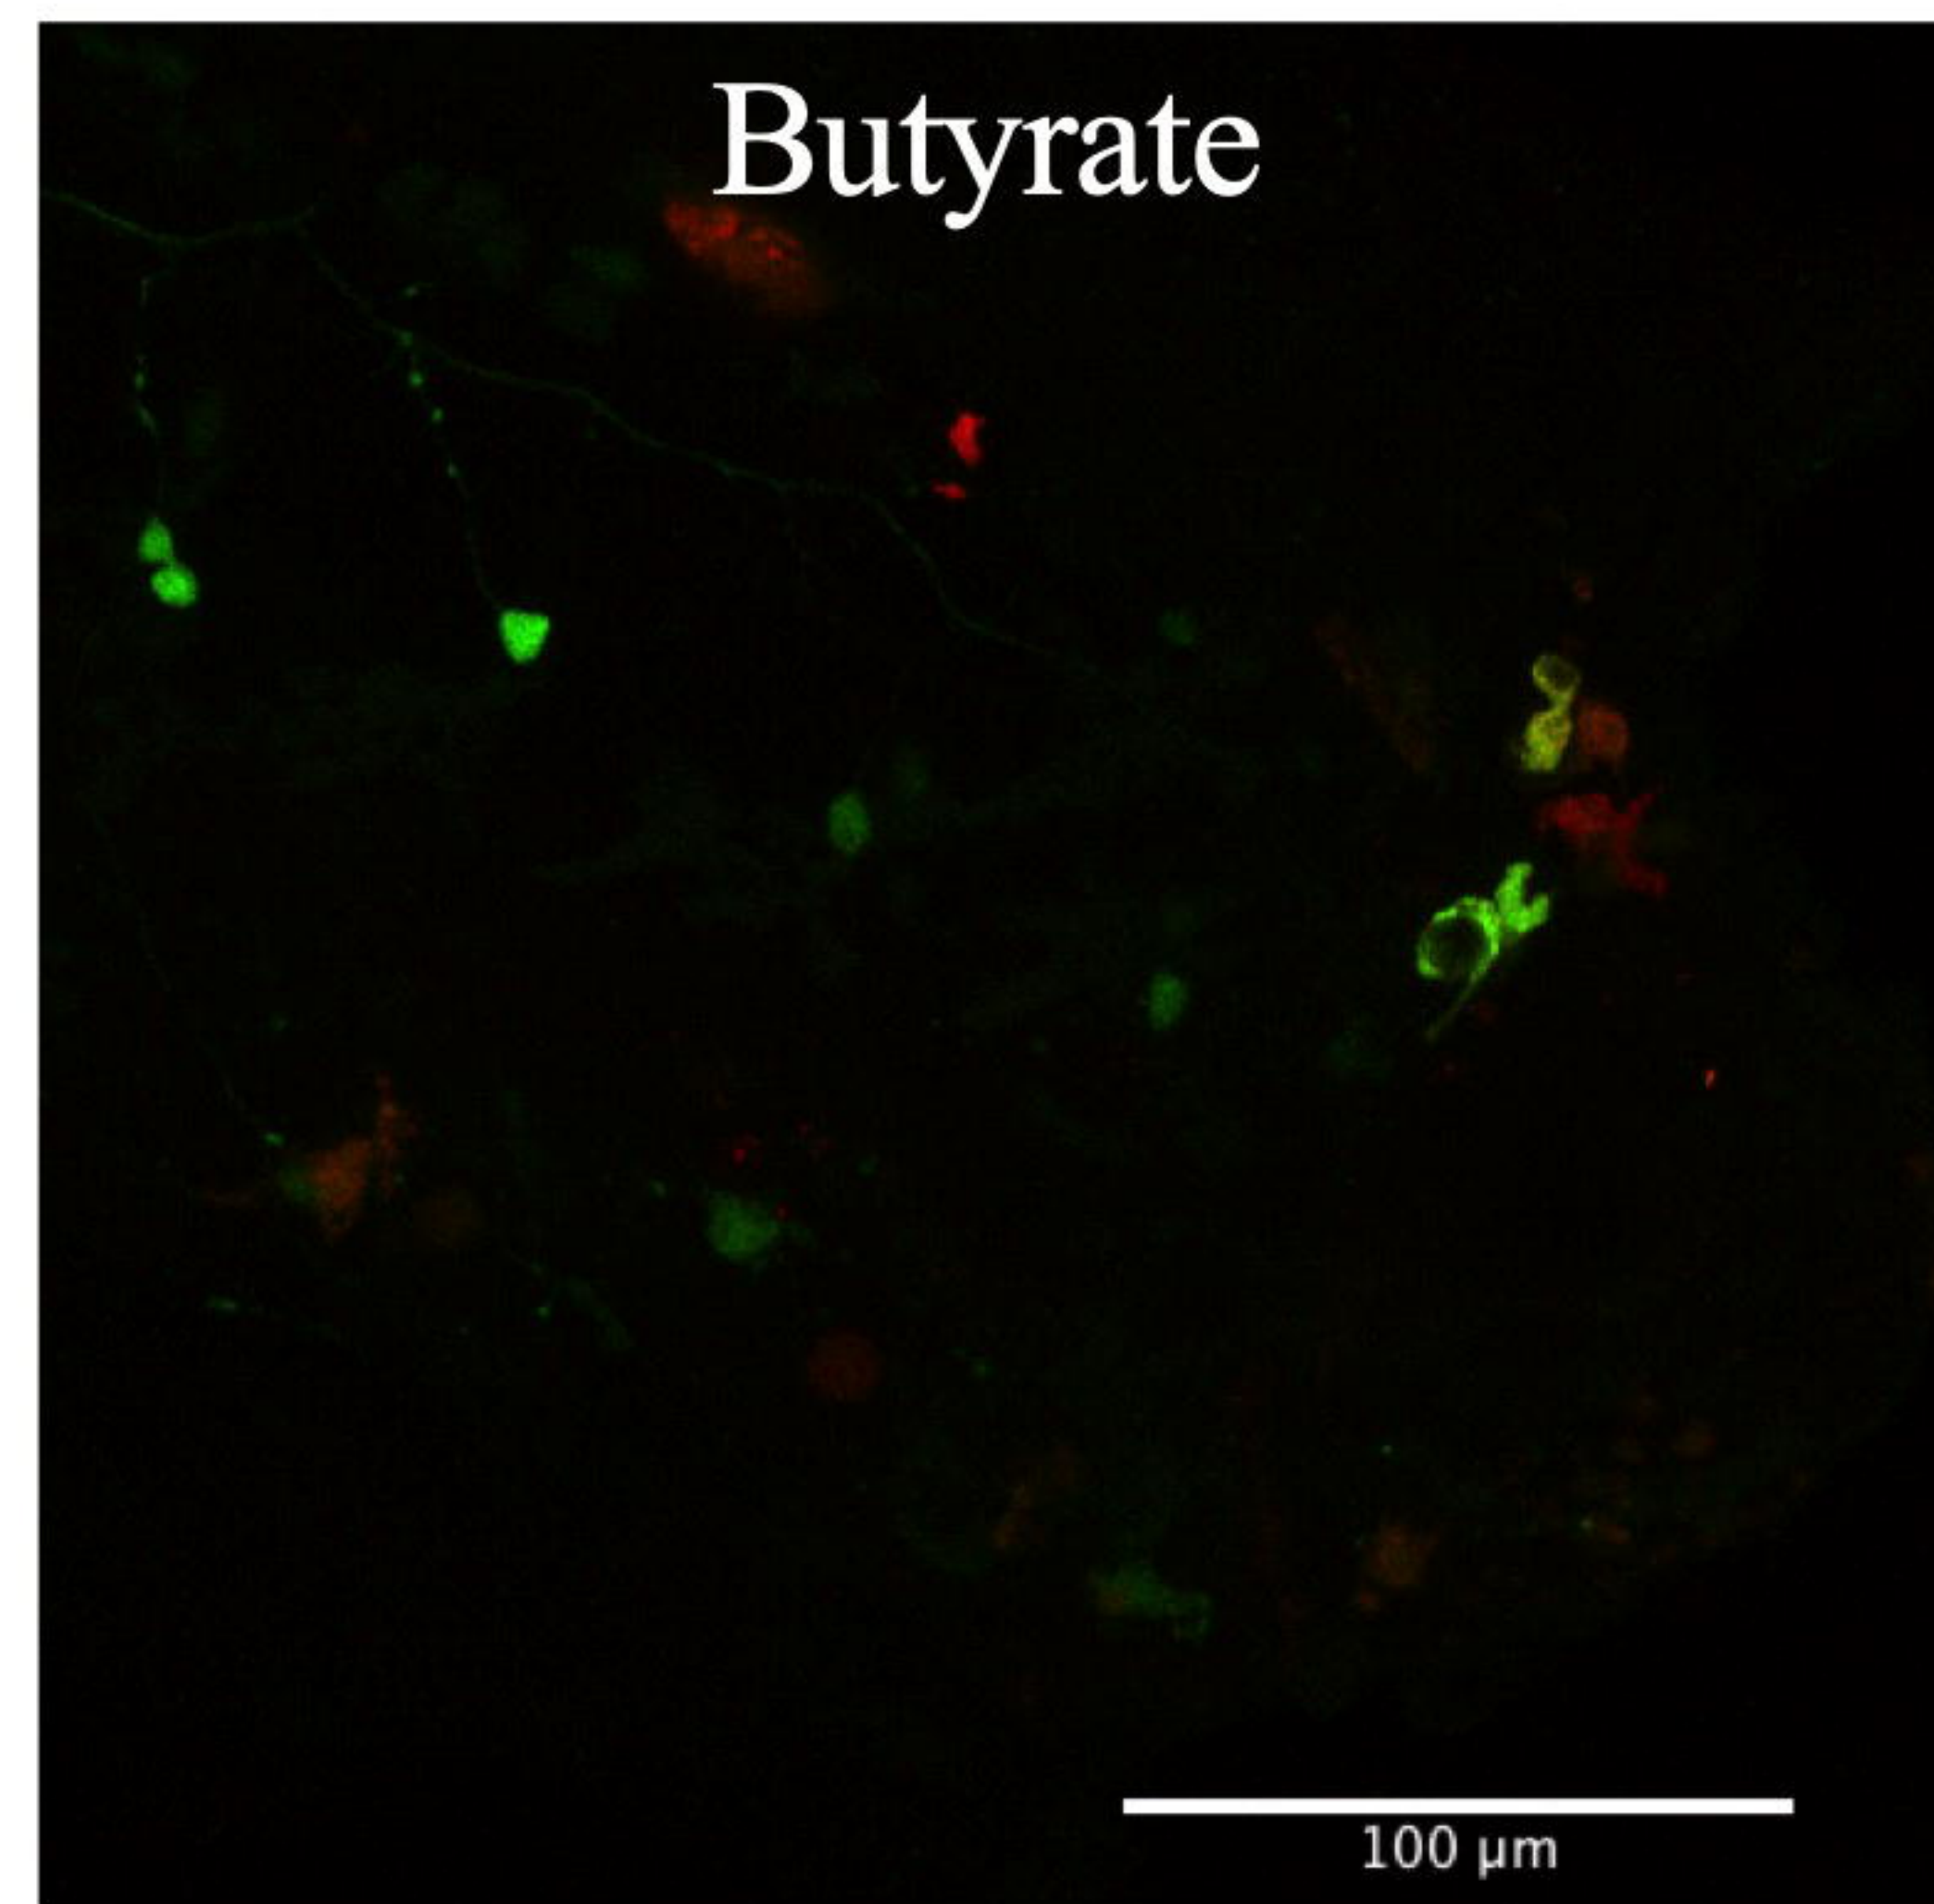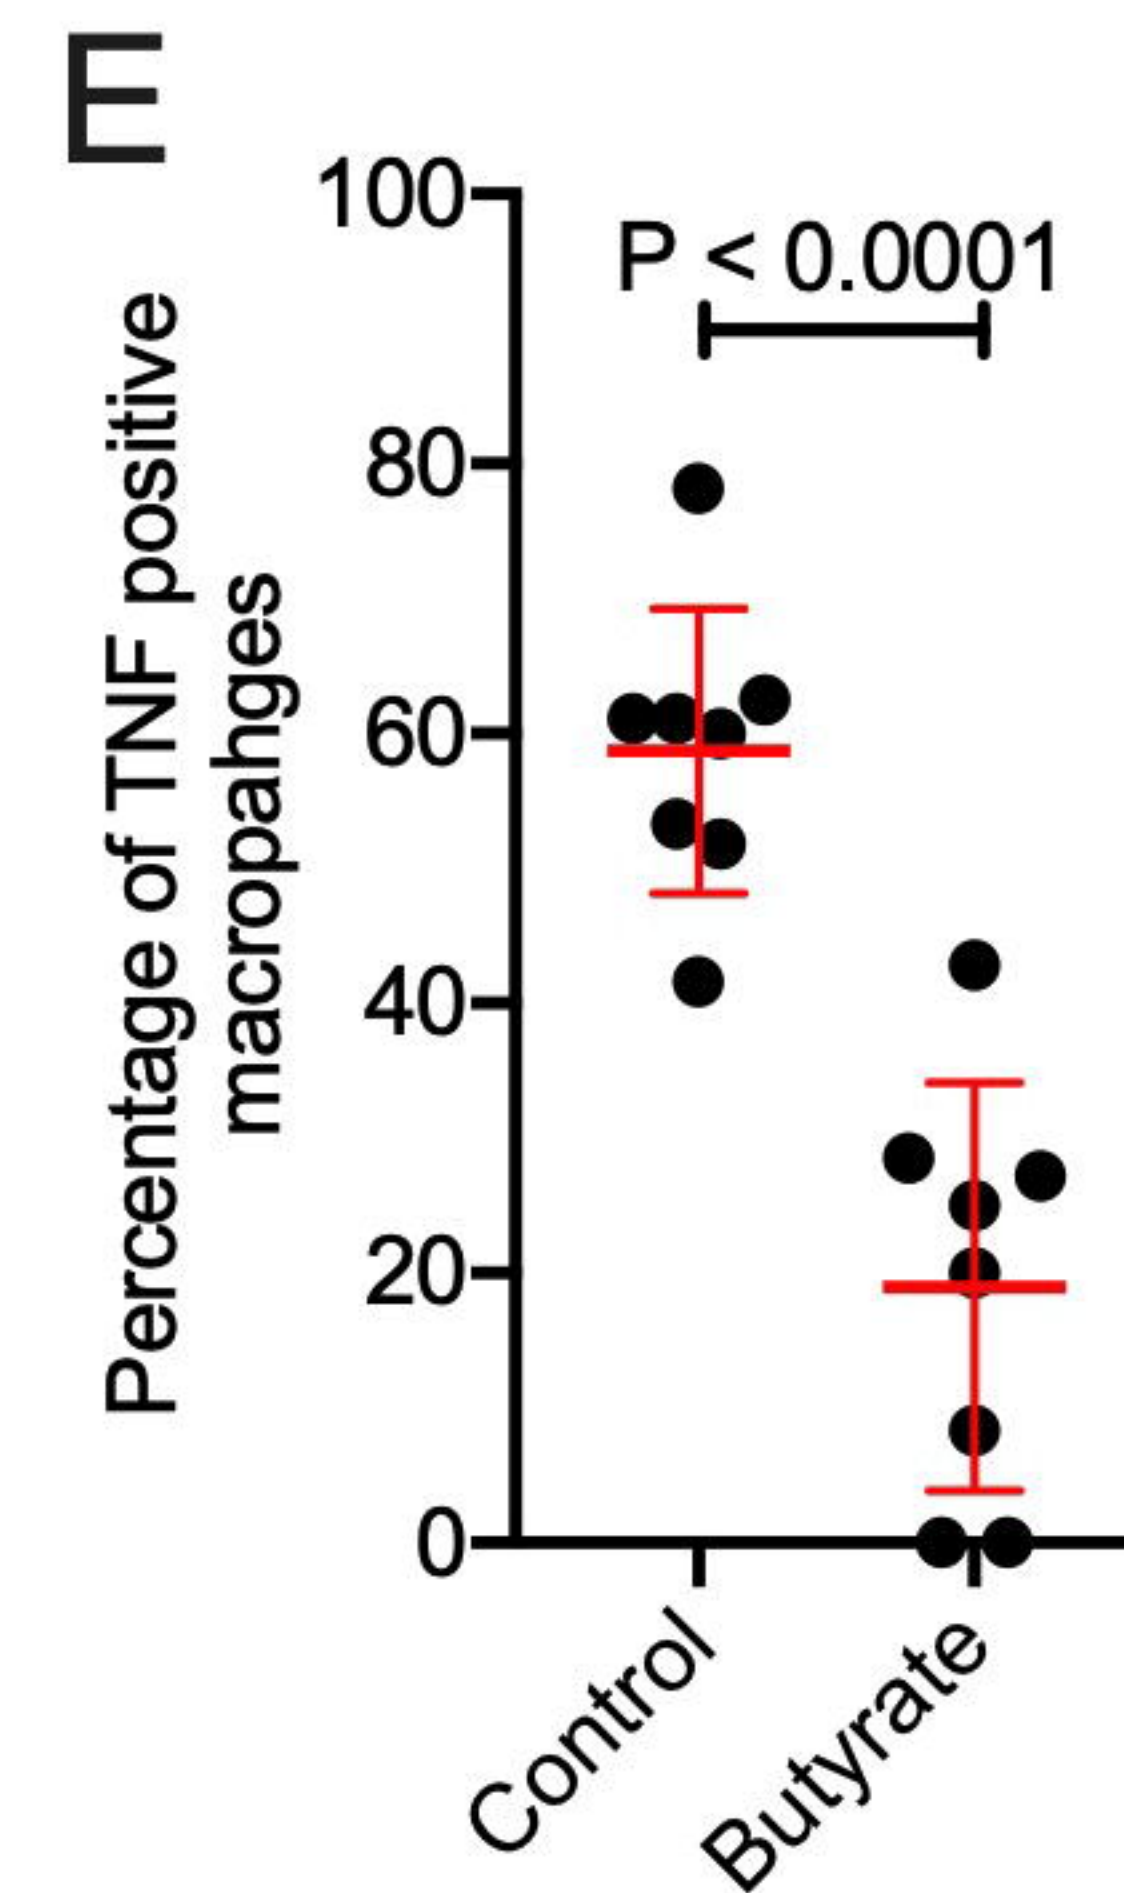

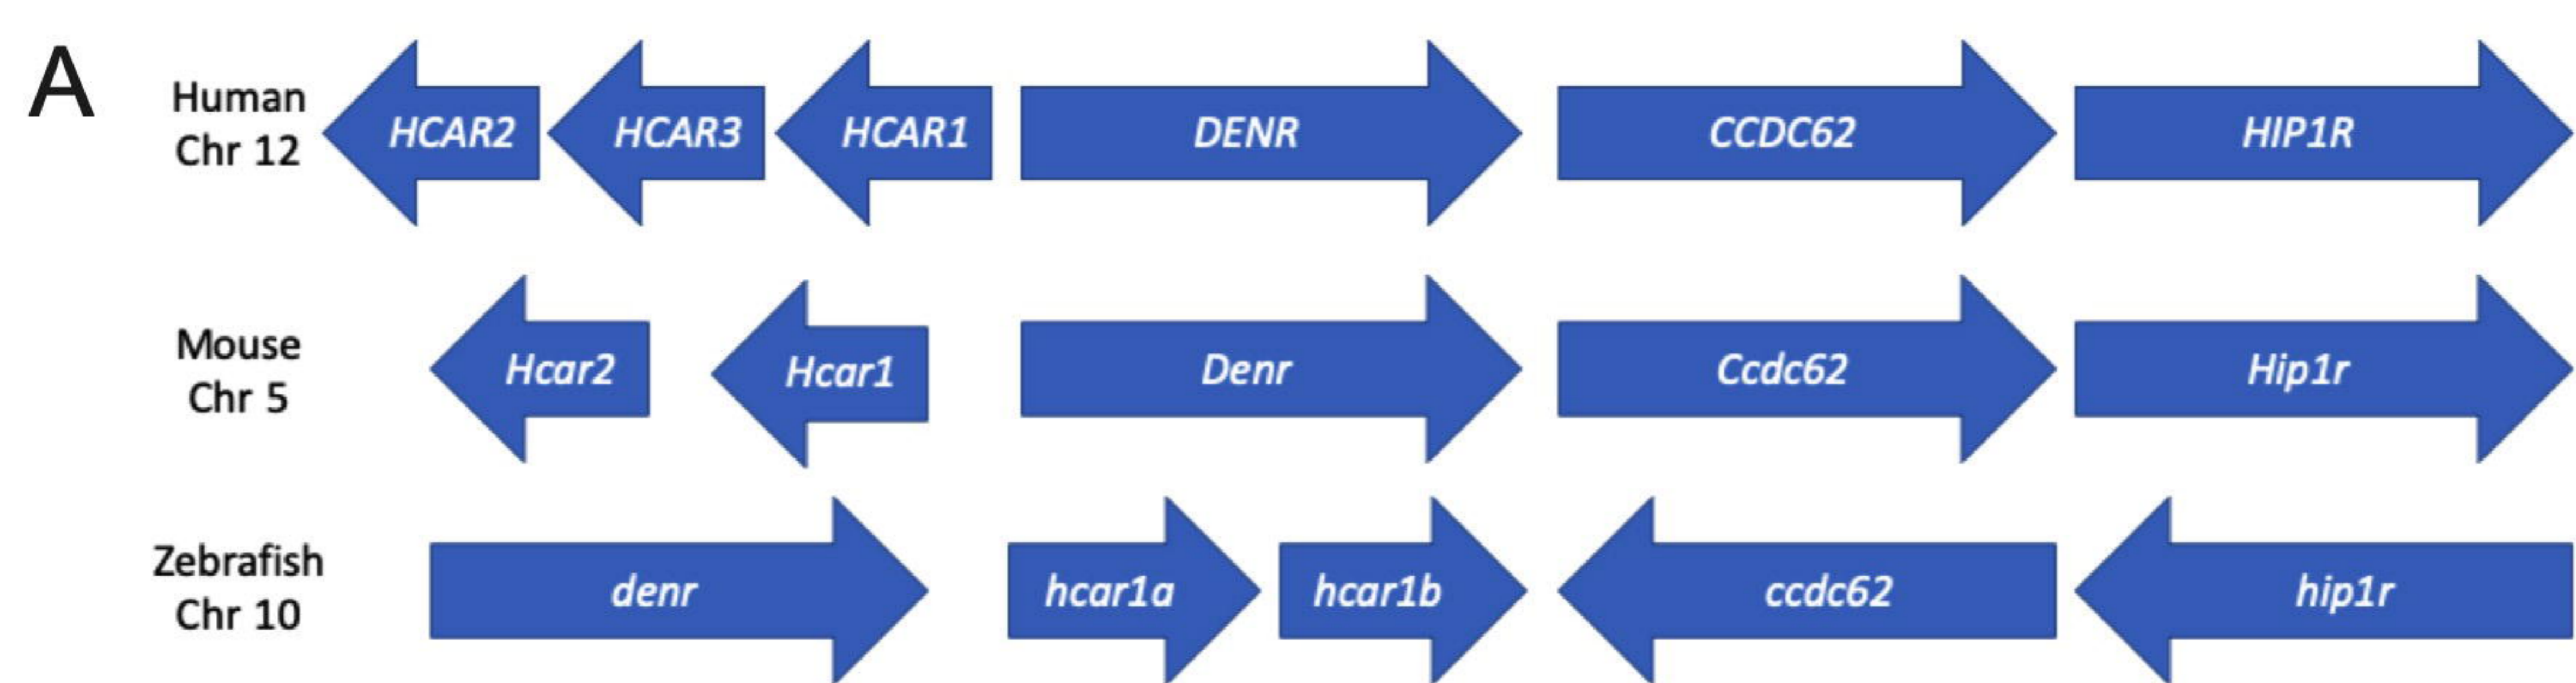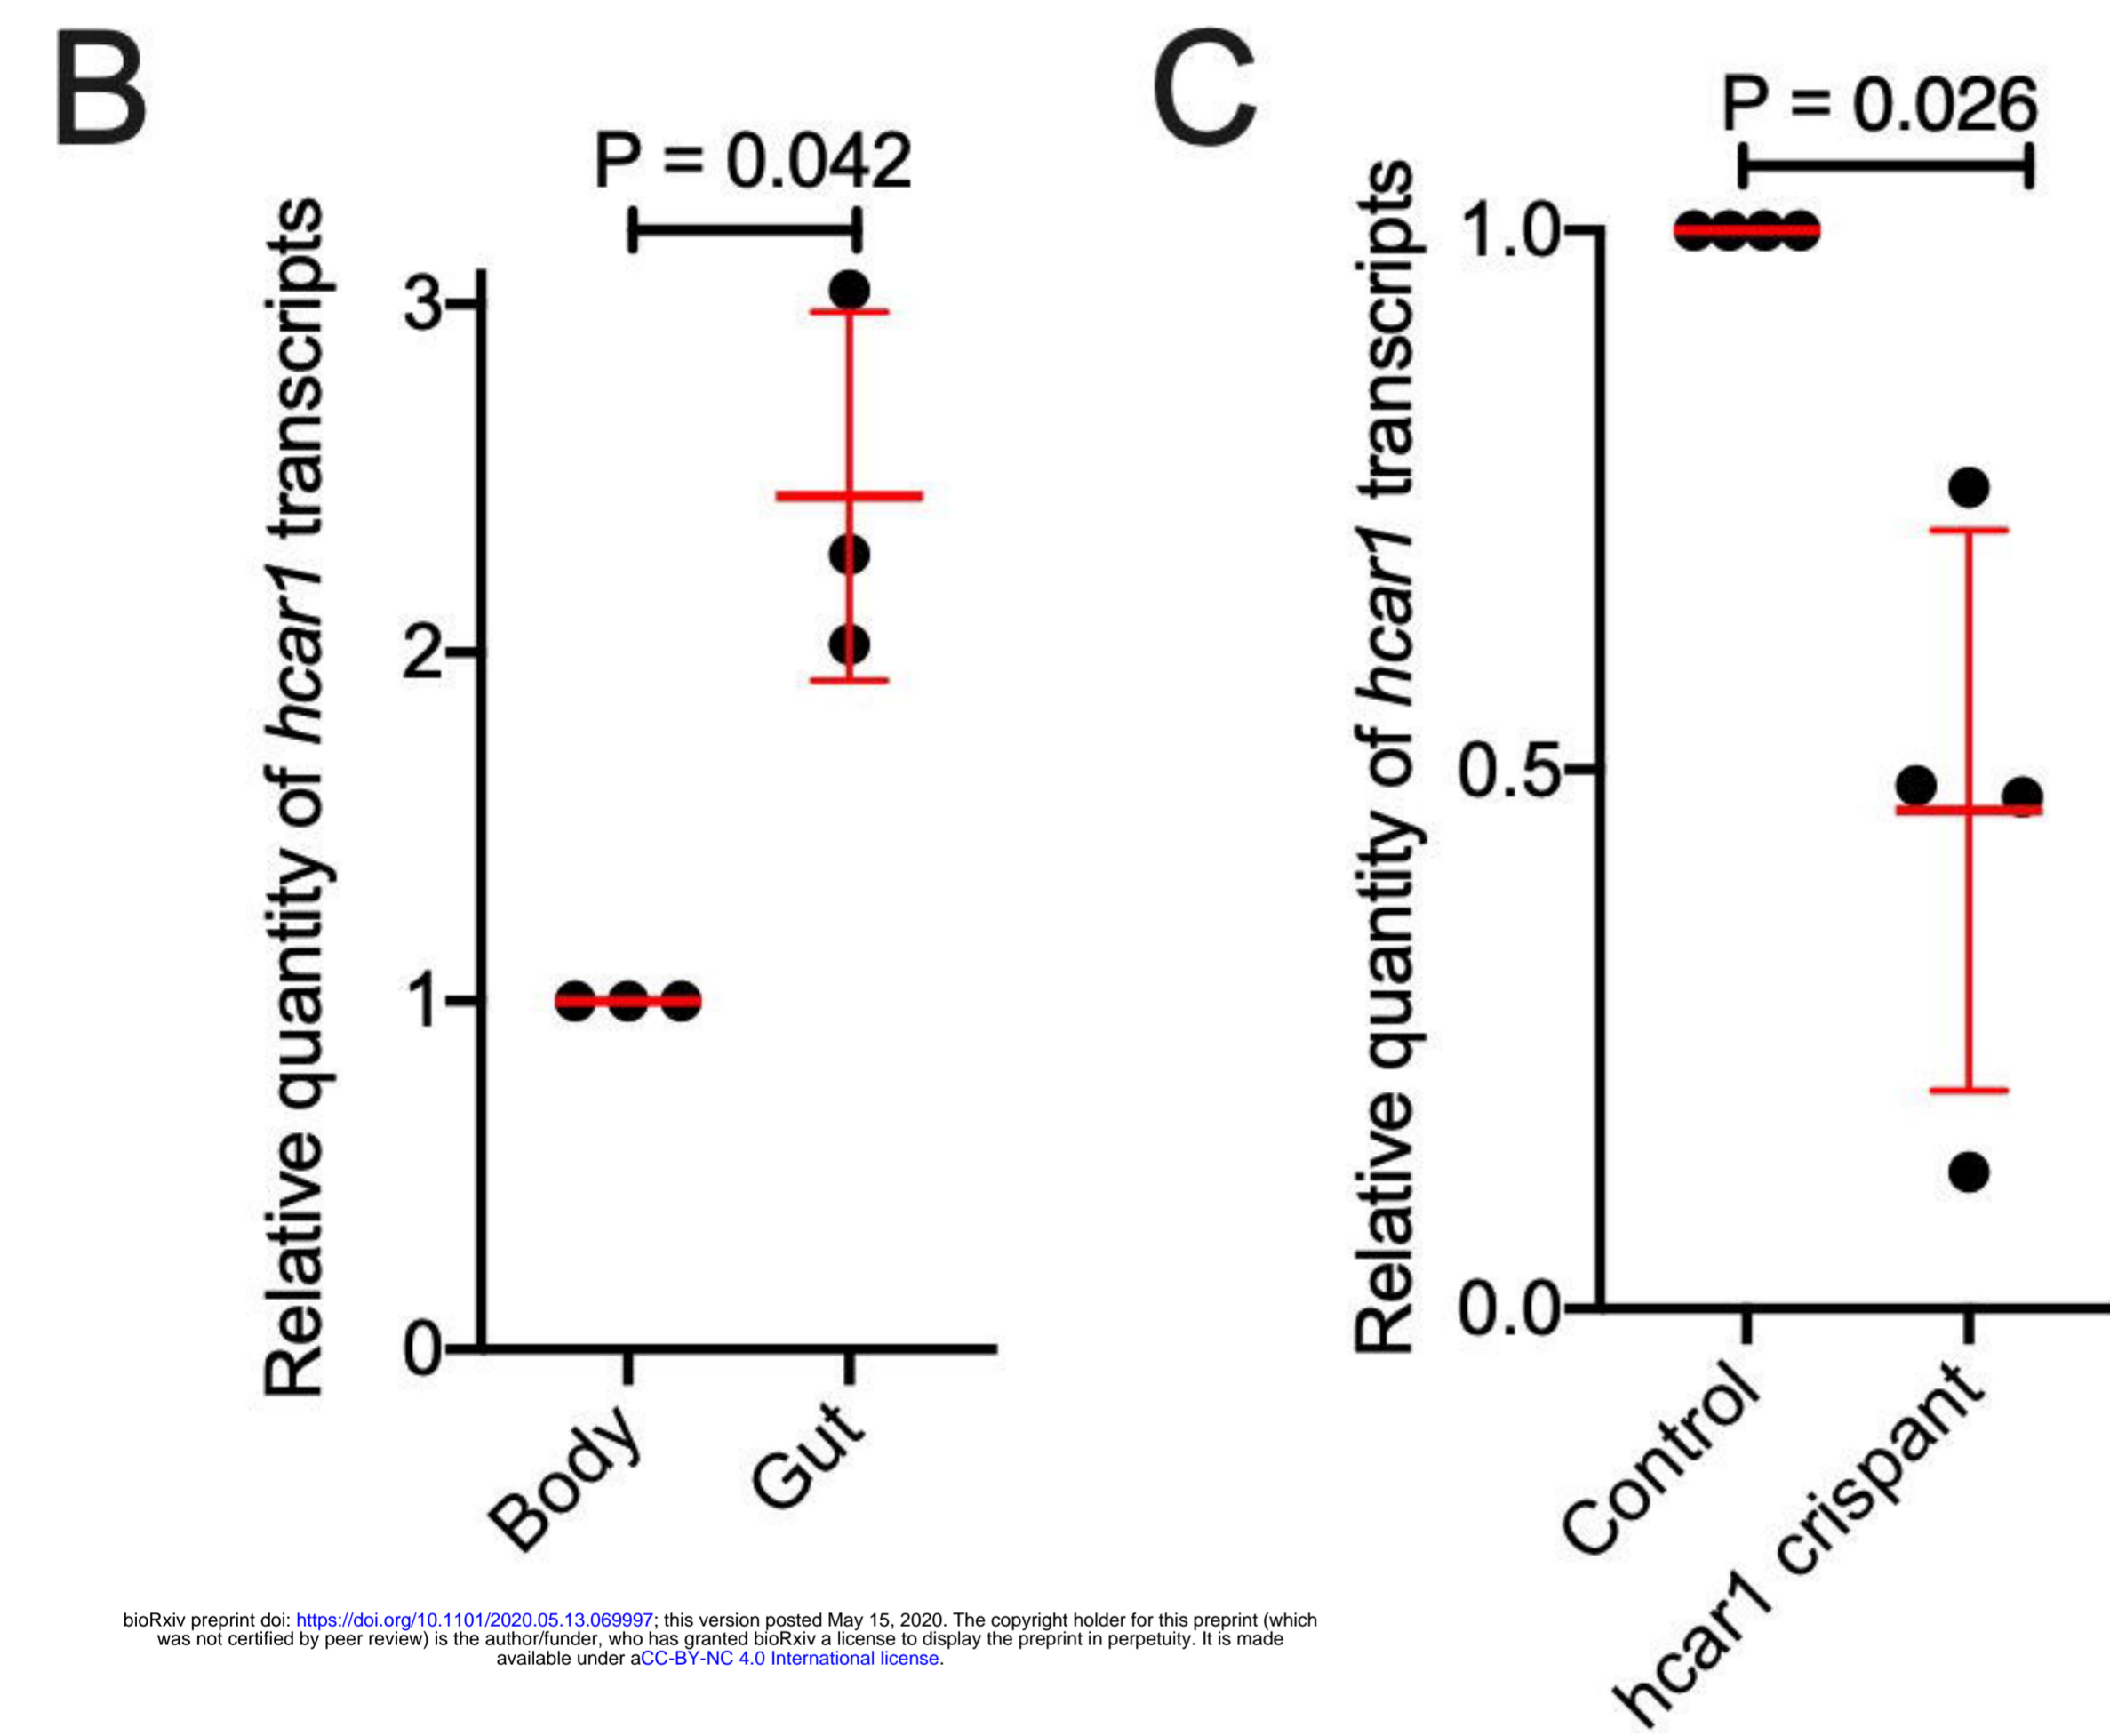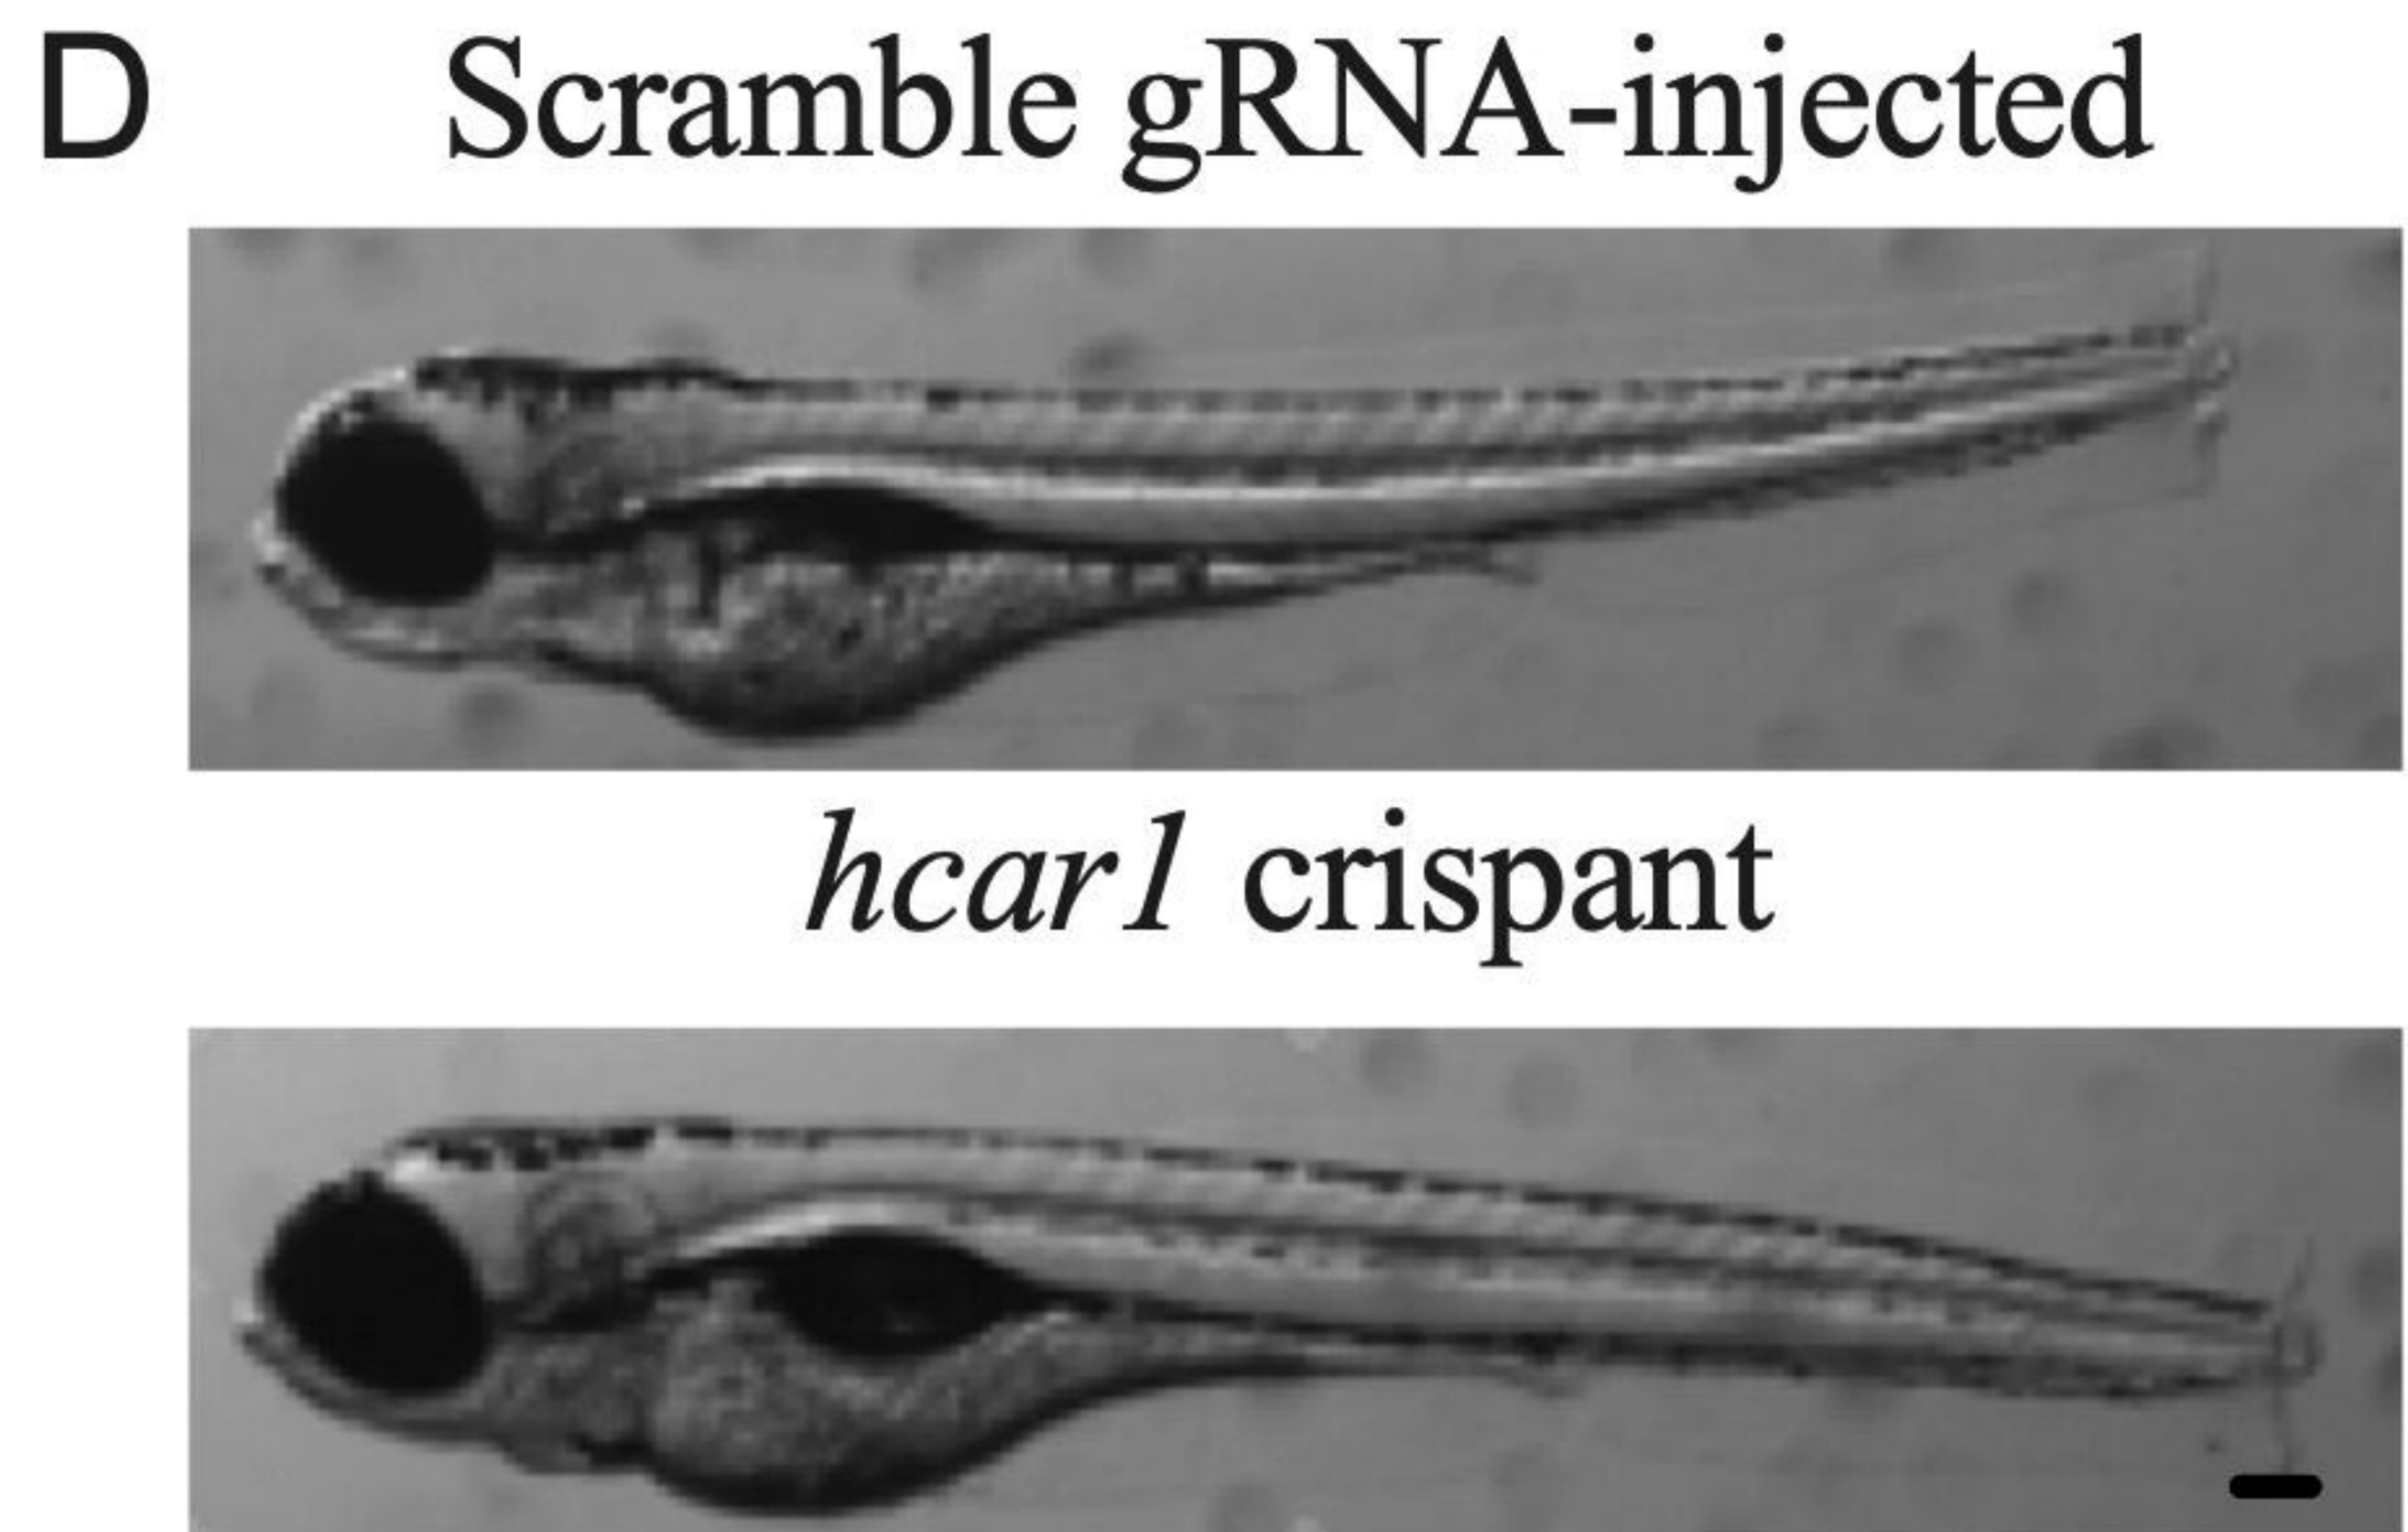

bioRxiv preprint doi: <https://doi.org/10.1101/2020.05.13.069997>; this version posted May 15, 2020. The copyright holder for this preprint (which was not certified by peer review) is the author/funder, who has granted bioRxiv a license to display the preprint in perpetuity. It is made available under aCC-BY-NC 4.0 International license.

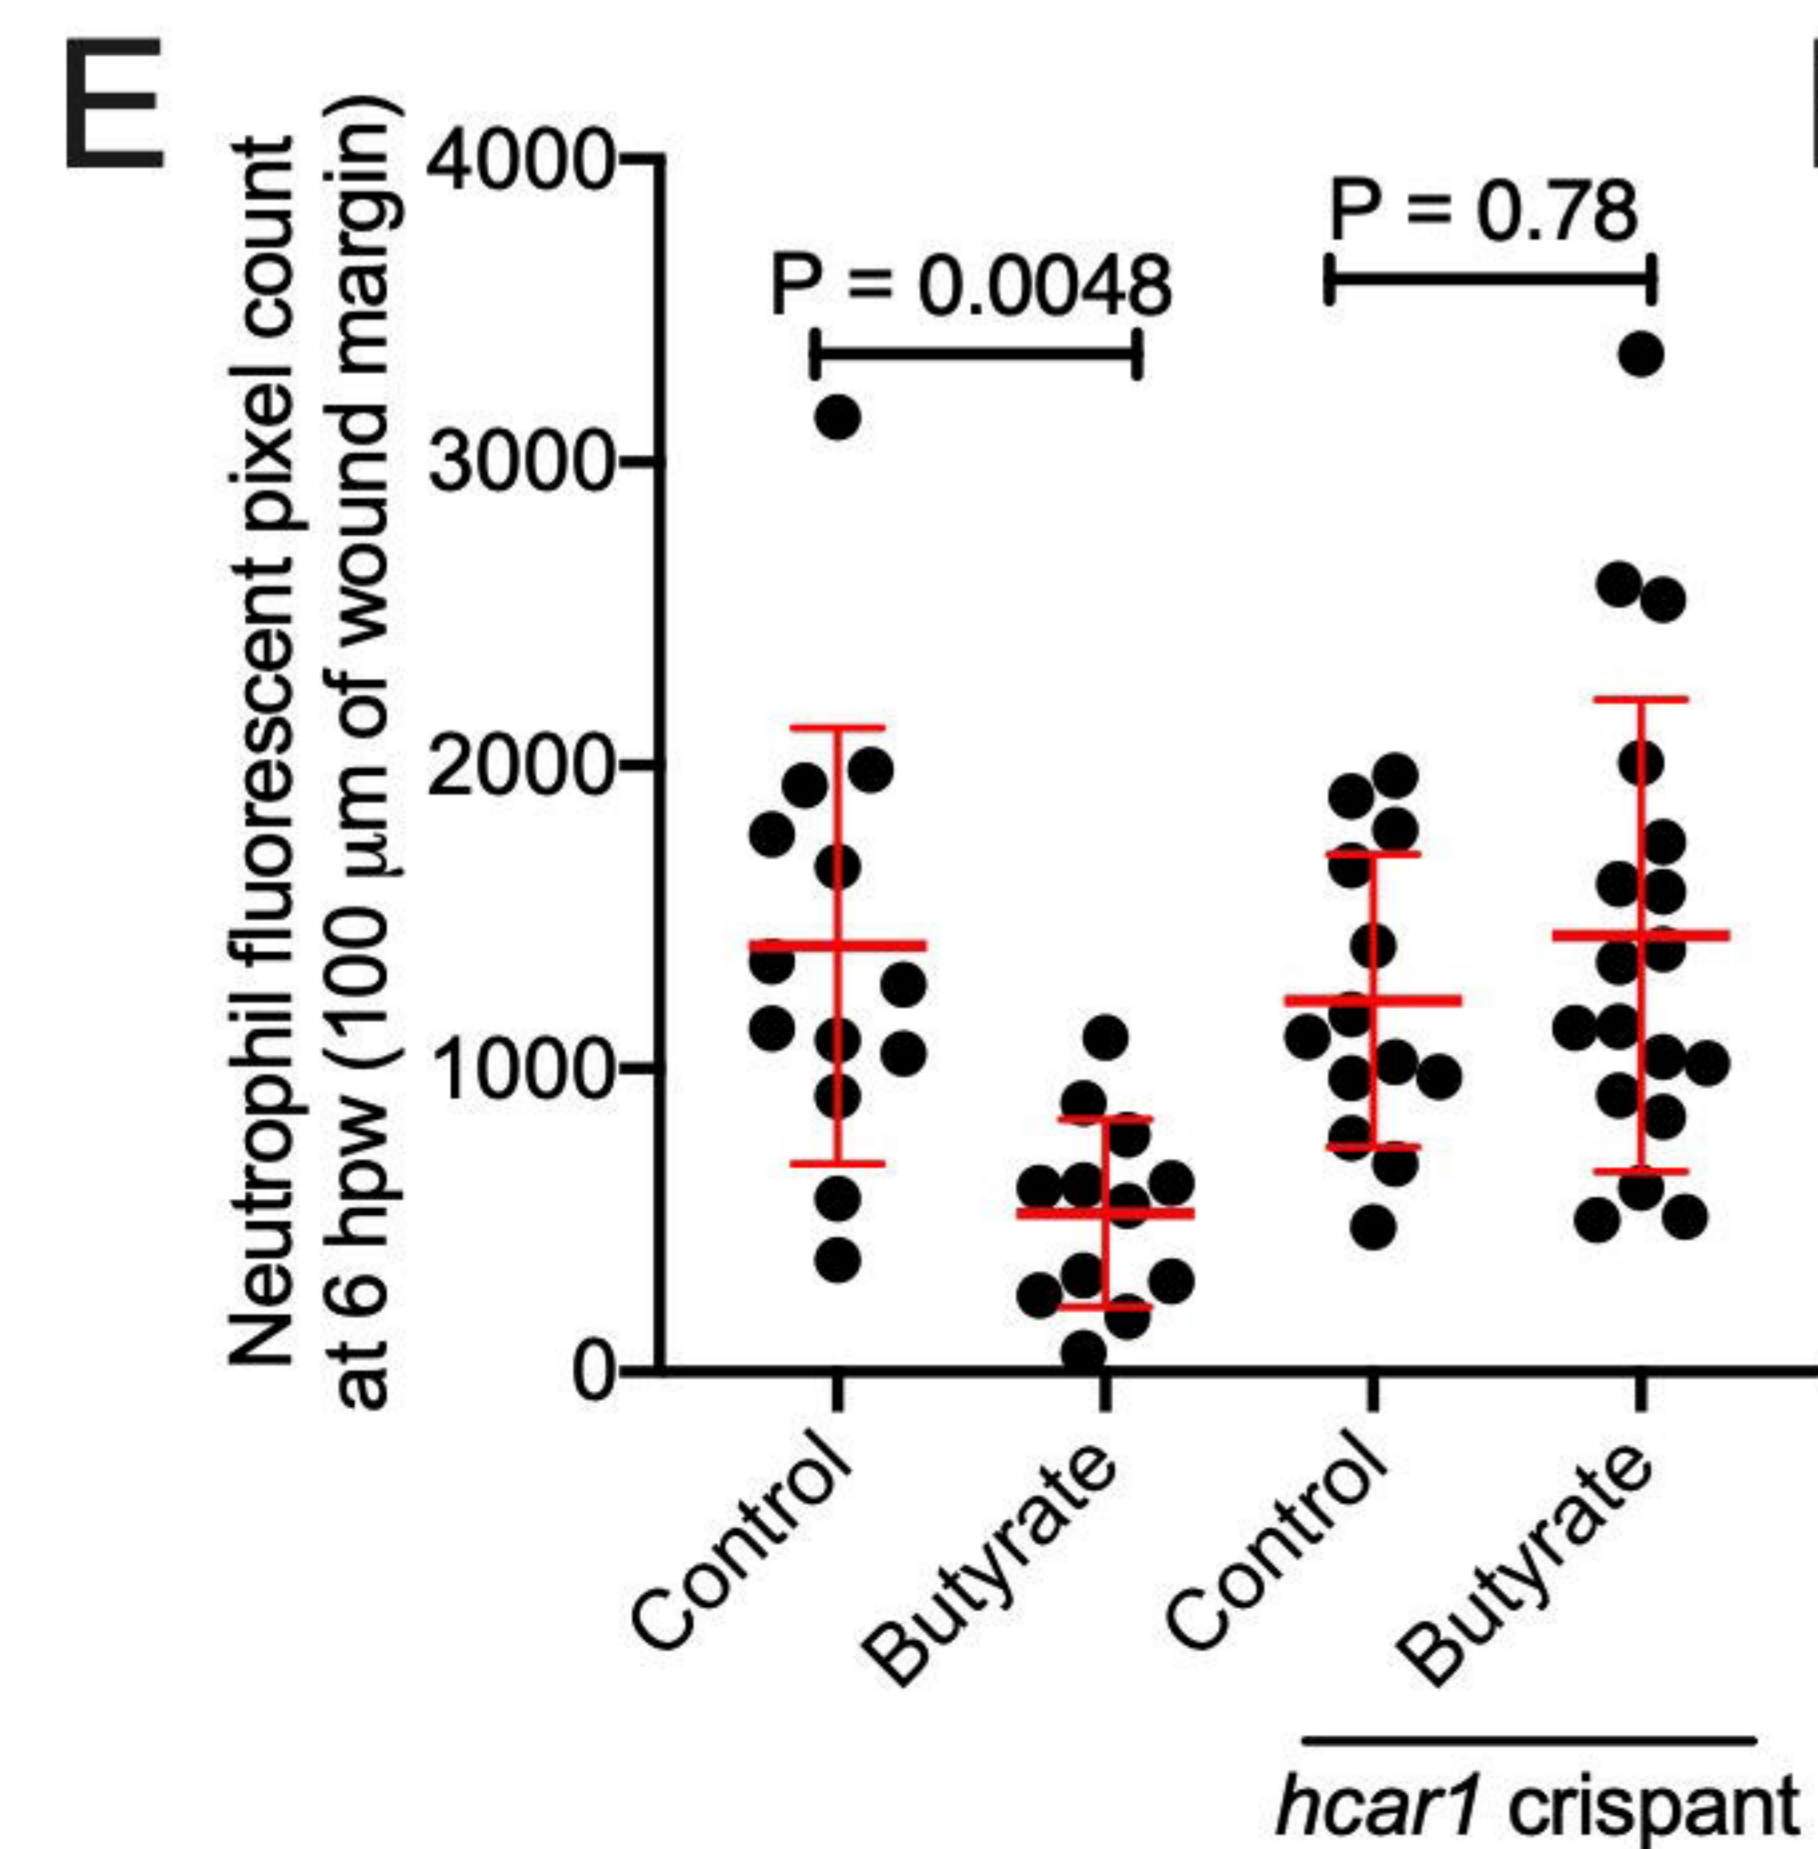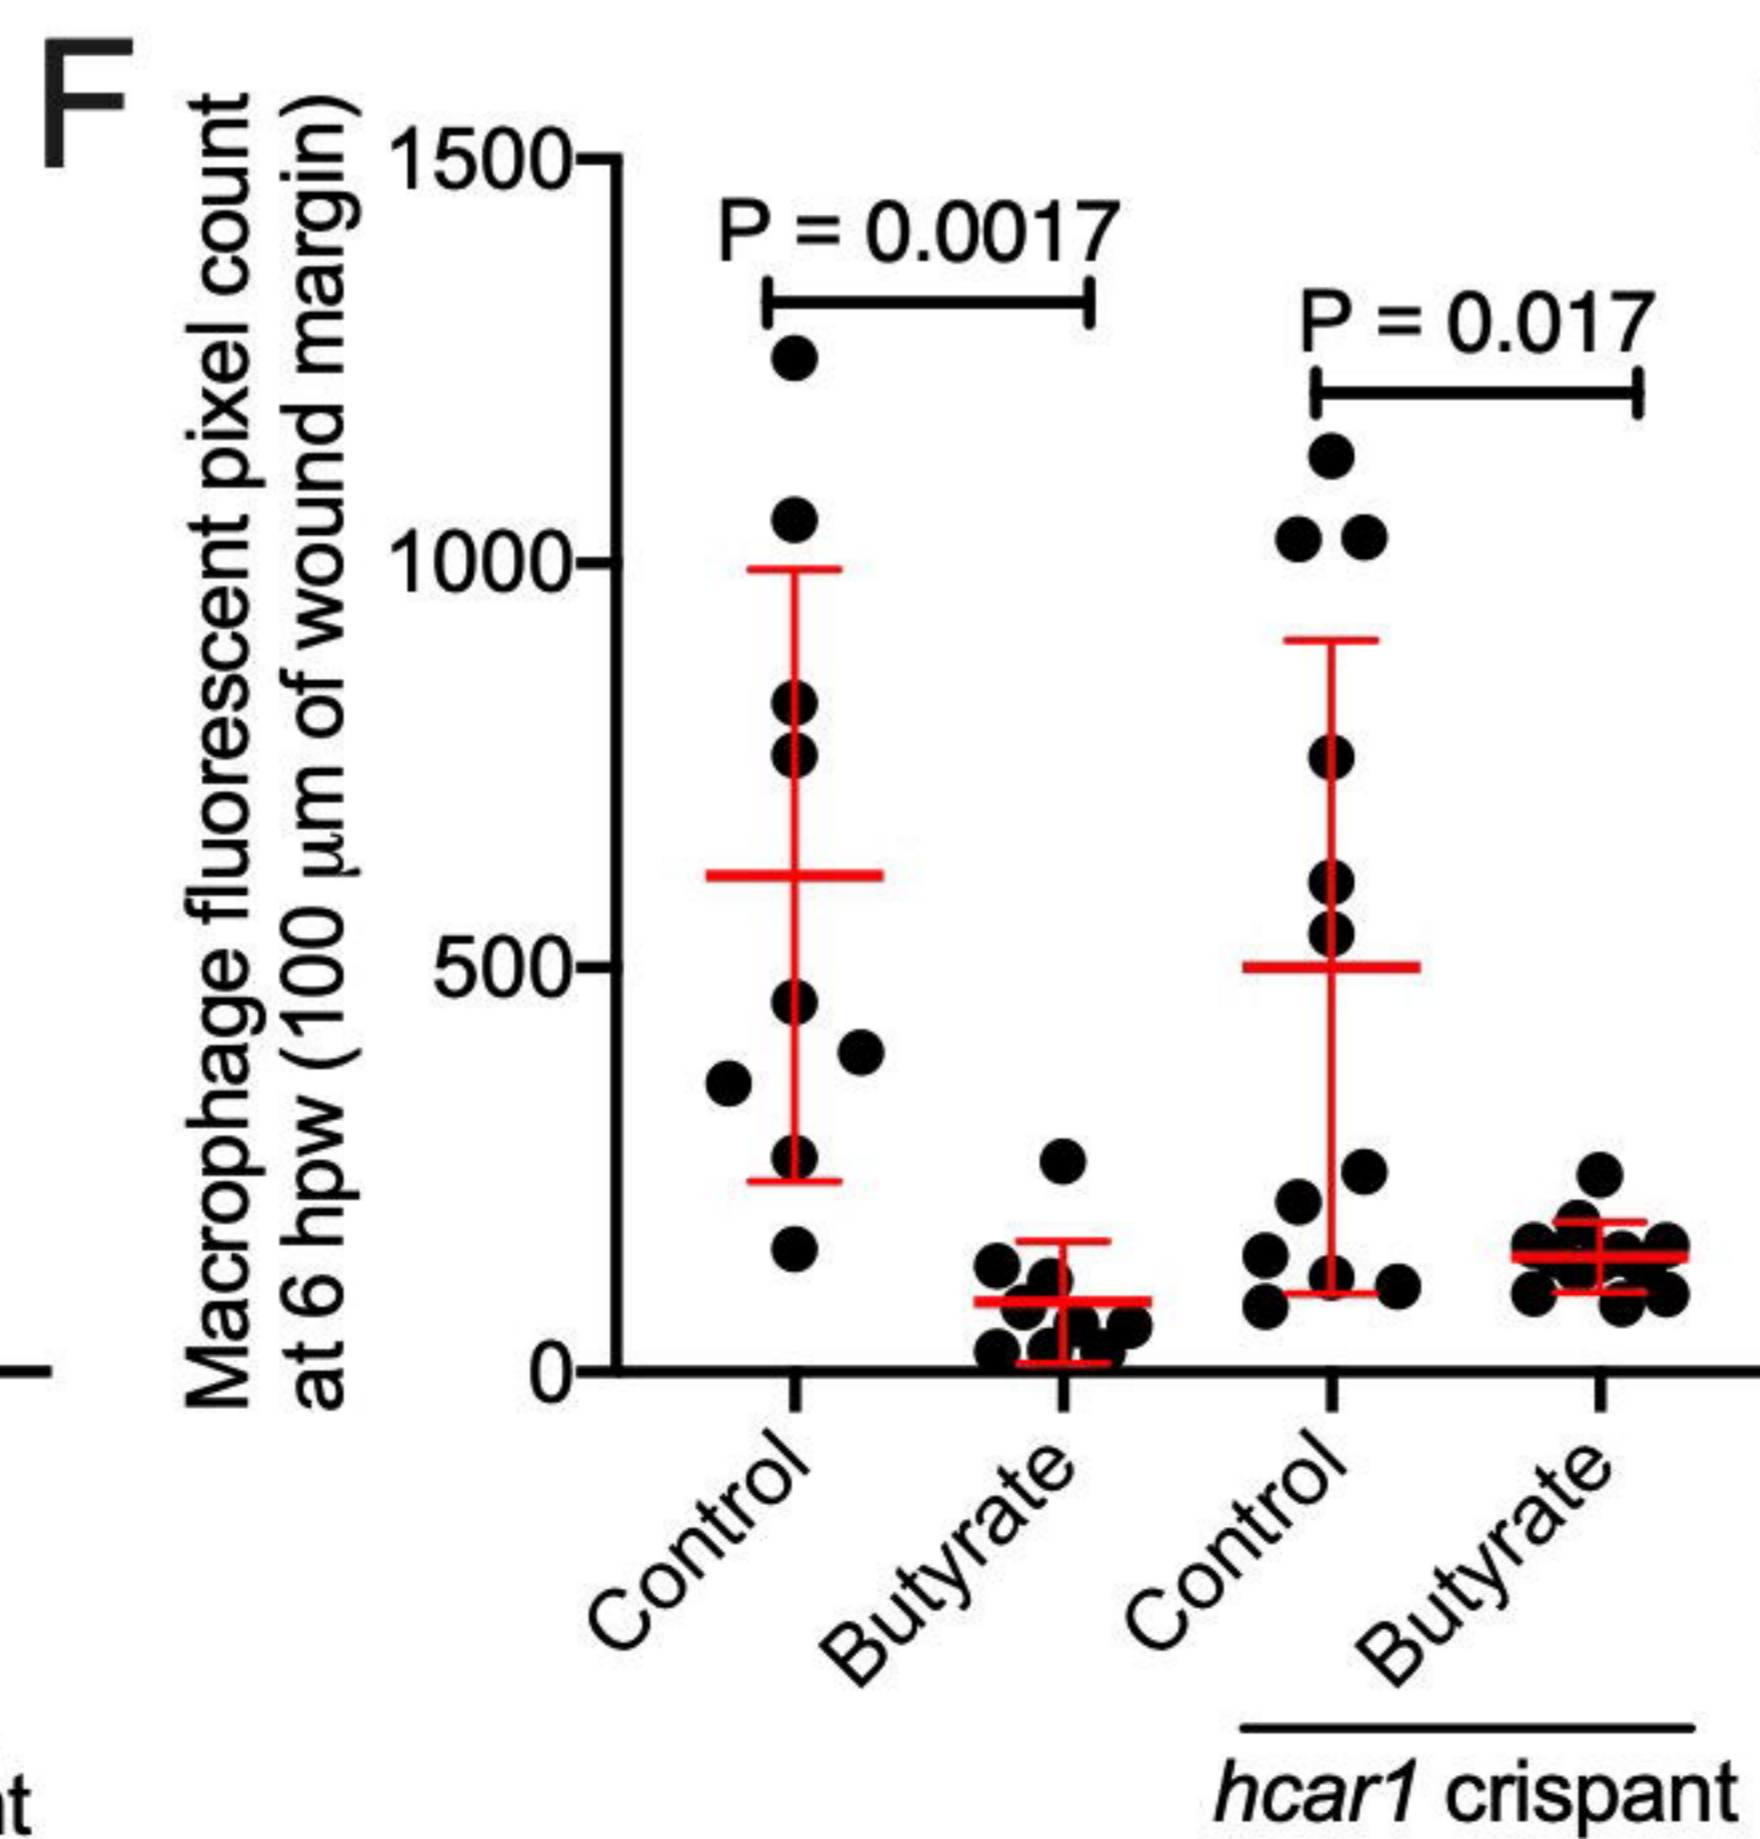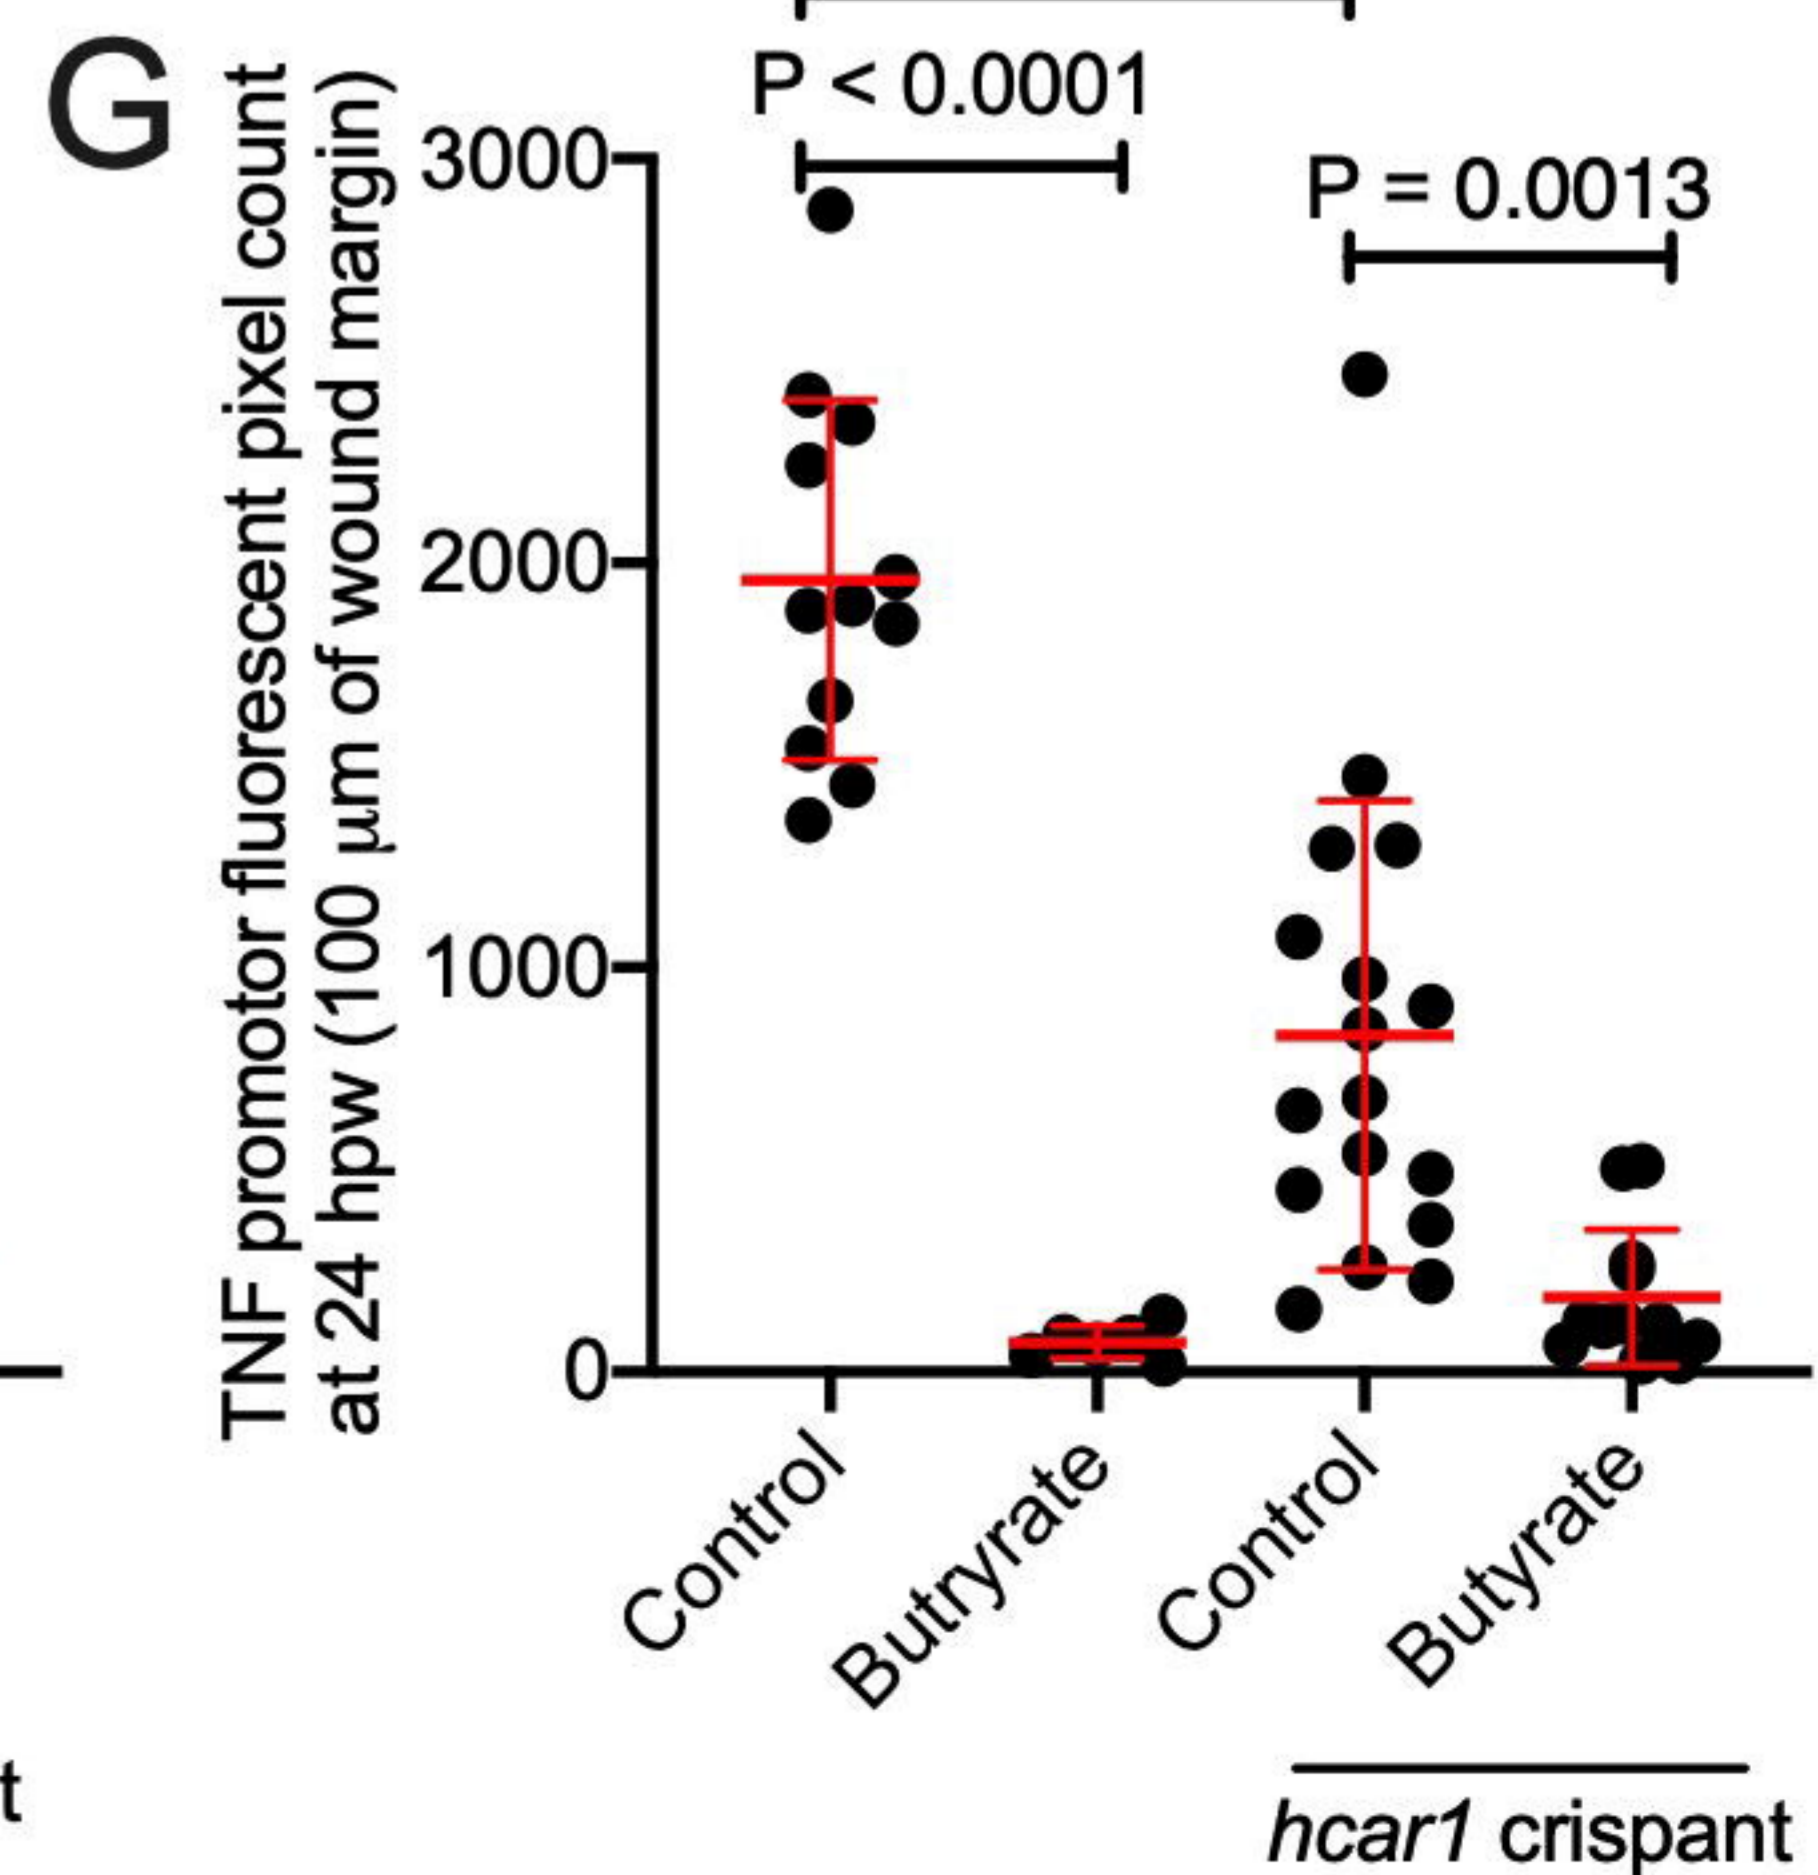

Source: https://www.biorxiv.org/content/biorxiv/early/2020/05/15/2020.05.13.069997.full.pdf
